# Supplementary material for: Synthesis of 3-indole derivatives by copper sulfonato Salen catalyzed three-component reactions in water
Source: Royal Society of Chemistry journal article supplement (doi:10.1039/c0cc05695b), 2011-01-01
Supplement: c0cc05695b.pdf [file c0cc05695b.pdf]

# Synthesis of 3-Indole Derivatives by Copper Sulfonato Salen-Catalyzed Three-Component Reactions in Water

Yanyang Qu,<sup>a</sup> Fang Ke,<sup>a</sup> Li Zhou,<sup>a</sup> Zhengkai Li,<sup>a</sup> Haifeng Xiang,<sup>a</sup> Di Wu<sup>a,b</sup> and Xiangge Zhou<sup>\*a,b</sup>

[a] Institute of Homogeneous Catalysis, College of Chemistry, Sichuan University, Chengdu 610041, China

[b] State Key Laboratory of Coordination Chemistry, Nanjing University, Nanjing 210093, China

E-mail: [zhouxiangge@scu.edu.cn](mailto:zhouxiangge@scu.edu.cn)

Fax: [+86-28-85412026](tel:+86-28-85412026)

## Supplementary Information

### Table of Contents

|                                                                                                                      |     |
|----------------------------------------------------------------------------------------------------------------------|-----|
| 1. General information                                                                                               | S2  |
| 2. General procedure for the synthesis of Ligands L <sup>1</sup> -L <sup>8</sup>                                     | S2  |
| 3. General procedure for the catalyzed three-component reaction between indole, aldehyde, and malononitrile in water | S2  |
| 4. Experimental procedures and characterization data                                                                 | S3  |
| 5. References                                                                                                        | S10 |
| 6. <sup>1</sup> H NMR and <sup>13</sup> C NMR spectra for the products                                               | S12 |

**1. General information:** All reagents were purchased from commercial suppliers and used without further purification. Column chromatography was performed on silica gel (200–300 mesh), eluting with ethyl acetate and petroleum ether. Thin layer chromatography was carried out using Merck silica gel GF254 plates.  $^1\text{H}$  NMR spectra were recorded at 400 MHz and  $^{13}\text{C}$  NMR spectra were recorded at 100 MHz (Bruker DPX) with  $\text{CDCl}_3$  or  $\text{DMSO}-d_6$  as solvent. Chemical shifts are reported in parts per million (ppm) down field from TMS with the solvent resonance as the internal standard. Coupling constants (J) are reported in Hz and refer to apparent peak multiplications.

## 2. General procedure for the synthesis of Ligands $\text{L}^1$ - $\text{L}^8$ <sup>8|1,2|</sup>

Ligands were prepared as previously described:<sup>1,2</sup> disodium salicylaldehyde 5-sulfonates (20 mmol) was heated to reflux temperature and then diamine (10 mmol) was drop-wise added in methanol (25 mL) and stirred at reflux temperature for 2-3 h. The reaction mixture was then cooled to 0°C. A precipitate was formed. After filtration and washed by cold methanol,  $\text{L}^1$ - $\text{L}^8$  were obtained in yields ranging from 78% to 92%.

## 3. General procedure for the catalyzed three-component reaction between indole, aldehyde, and malononitrile in water

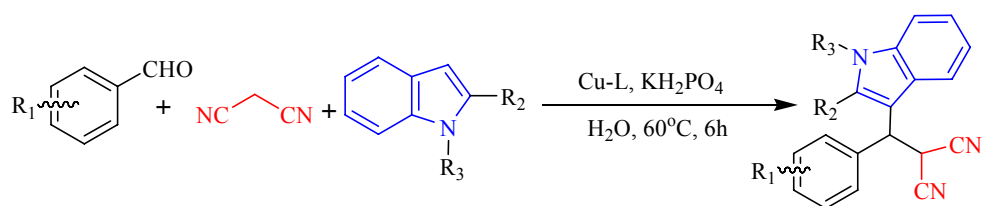

In a typical procedure,  $\text{Cu}(\text{OAc})_2$  (0.19 mg, 0.001 mmol) and ligand 0.001 mmol was added 3.0 mL water and the mixture was stirred at room temperature for 2 hrs. Then, 13.6 mg  $\text{KH}_2\text{PO}_4$  (0.1 mmol), aldehyde (0.1 mmol), the malononitrile (0.11 mmol), and indole (0.11 mmol) was added sequentially to form clear yellow solution. The resulting mixture was stirred at 60°C for 6hrs and then cooled to room temperature and extracted with ethyl acetate. The organic layer was dried over  $\text{Na}_2\text{SO}_4$  and the solvent was removed under reduced pressure. The residue was purified by silica gel flash column chromatography (petroleum ether/AcOEt: 8:1 to 4:1) to give the desired product.

Besides the ligands  $\text{L}^1$ - $\text{L}^8$ , the following ligands  $\text{L}^9$ - $\text{L}^{12}$  were also tried in this work, and the related results were listed below in Table 1.

**Table 1.** Screening of other ligands for the catalytic three-component reaction

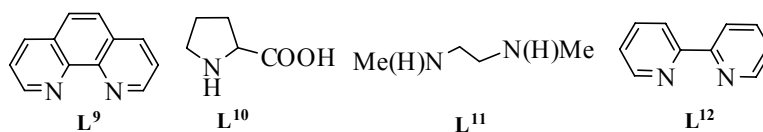

| Entry | Metal(mol%)              | L ( mol%)           | Base/acid                       | Yield(%) <sup>b</sup> |
|-------|--------------------------|---------------------|---------------------------------|-----------------------|
| 1     | Cu(OAc) <sub>2</sub> (5) | L <sup>9</sup> (5)  | KH <sub>2</sub> PO <sub>4</sub> | 79                    |
| 2     | Cu(OAc) <sub>2</sub> (5) | L <sup>10</sup> (5) | KH <sub>2</sub> PO <sub>4</sub> | 63                    |
| 3     | Cu(OAc) <sub>2</sub> (5) | L <sup>11</sup> (5) | KH <sub>2</sub> PO <sub>4</sub> | 48                    |
| 4     | Cu(OAc) <sub>2</sub> (5) | L <sup>12</sup> (5) | KH <sub>2</sub> PO <sub>4</sub> | 72                    |

<sup>a</sup> Unless otherwise specified, all reactions were carried out using metal salt and ligand 5 mol%, 1.0 equiv of acid/base, benzaldehyde 0.1 mmol, propanedinitrile 0.11 mmol, indole 0.11 mmol in water (3 mL) at 60 °C for 6 hours. <sup>b</sup> Isolated yield.

#### 4. Experimental procedures and characterization data

##### 2-((1H-indol-3-yl)(phenyl)methyl)malononitrile

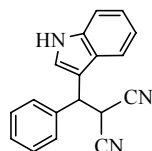

Following the general procedure the title compound was isolated by flash chromatography (eluent: ethyl acetate/petrol ether =1/4) as a yellow solid in 96% yield.

<sup>1</sup>H NMR (400 MHz, DMSO-*d*<sub>6</sub>) δ = 11.23(s, 1H), 7.57(d, *J* = 2.4 Hz, 1H), 7.52(d, *J* = 8.0 Hz, 2H), 7.48(d, *J* = 8.0 Hz, 1H), 7.40-7.36(m, 3H), 7.31-7.27(m, 1H), 7.10(t, *J* = 8.0 Hz, 1H), 6.96(t, *J* = 7.6 Hz, 1H), 5.86(d, *J* = 9.2 Hz, 1H), 5.22(d, *J* = 9.6 Hz, 1H) ppm.

<sup>13</sup>C NMR (100 MHz, DMSO-*d*<sub>6</sub>) δ = 139.2, 136.0, 128.6, 128.0, 125.9, 122.7, 121.6, 118.9, 118.5, 114.1, 113.8, 112.3, 111.7, 42.4, 28.6 ppm;

MS (EI, *m/z*): 271 [M<sup>+</sup>]

##### 2-((1H-indol-3-yl)(4-nitrophenyl)methyl)malononitrile

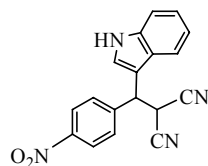

Following the general procedure the title compound was isolated by flash chromatography (eluent: ethyl acetate/petrol ether =1/4) as a yellow solid in 97% yield.

<sup>1</sup>H NMR (400 MHz, DMSO-*d*<sub>6</sub>) δ = 11.34(bs, 1H), 8.27(d, *J* = 8.8 Hz, 2H), 7.82(d, *J* = 8.8 Hz, 2H), 7.64(d, *J* = 7.6 Hz, 1H), 7.50(d, *J* = 8.0 Hz, 1H), 7.42(d, *J* = 8.0 Hz, 1H), 7.12(t, *J* = 7.2 Hz, 1H), 6.99(t, *J* = 7.6 Hz, 1H), 6.01(d, *J* = 9.2 Hz, 1H), 5.52(d, *J* = 9.6 Hz, 1H) ppm.

<sup>13</sup>C NMR (100 MHz, DMSO-*d*<sub>6</sub>) δ = 147.5, 147.1, 136.6, 129.9, 126.2, 124.4, 123.6, 122.4, 119.6, 118.8, 114.0, 112.3, 111.7, 42.3, 28.6 ppm.

**MS (EI, m/z):** 316 [M<sup>+</sup>]

**2-((1H-indol-3-yl)(2-nitrophenyl)methyl)malononitrile**

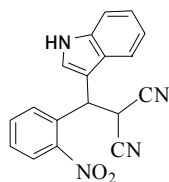

Following the general procedure the title compound was isolated by flash chromatography (eluent: ethyl acetate/petrol ether =1/4) as a yellow solid in 93% yield.

**<sup>1</sup>H NMR (400 MHz, DMSO-*d*<sub>6</sub>)** δ = 11.35(s, 1H), 8.01(d, *J* = 8.0 Hz, 1H), 7.84-7.77(m, 2H), 7.61(t, *J* = 7.6 Hz, 1H), 7.54(s, 1H), 7.40(t, *J* = 7.6 Hz, 2H), 7.12(t, *J* = 7.6 Hz, 1H), 6.98(t, *J* = 7.6 Hz, 1H), 5.97(d, *J* = 9.2 Hz, 1H), 5.76(d, *J* = 8.8 Hz, 1H) ppm.

**<sup>13</sup>C NMR (100 MHz, DMSO-*d*<sub>6</sub>)** δ = 149.7, 136.5, 134.1, 132.9, 130.1, 130.0, 126.1, 125.5, 124.6, 122.4, 119.8, 118.7, 114.0, 113.9, 112.3, 111.0, 38.0, 28.9 ppm.

**MS (EI, m/z):** 316 [M<sup>+</sup>]

**2-((1H-indol-3-yl)(3-nitrophenyl)methyl)malononitrile**

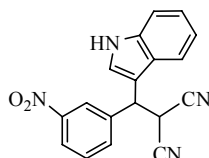

Following the general procedure the title compound was isolated by flash chromatography (eluent: ethyl acetate/petrol ether =1/4) as a yellow solid in 94% yield.

**<sup>1</sup>H NMR (400 MHz, DMSO-*d*<sub>6</sub>)** δ = 11.34(s, 1H), 8.45(s, 1H), 8.18(d, *J* = 8.0 Hz, 1H), 8.02(d, *J* = 7.2 Hz, 2H), 7.73-7.67(m, 2H), 7.52(d, *J* = 8.0 Hz, 1H), 7.41(d, *J* = 8.0 Hz, 1H), 7.12(t, *J* = 7.6 Hz, 1H), 6.99(t, *J* = 7.6 Hz, 1H), 6.03(d, *J* = 9.2 Hz, 1H), 5.55(d, *J* = 9.6 Hz, 1H) ppm.

**<sup>13</sup>C NMR (100 MHz, DMSO-*d*<sub>6</sub>)** δ = 148.4, 141.9, 136.6, 135.3, 130.8, 126.2, 123.6, 123.4, 123.3, 122.4, 119.6, 118.8, 114.2, 114.0, 112.3, 111.8, 42.1, 28.8 ppm.

**MS (EI, m/z):** 316 [M<sup>+</sup>]

**2-((1H-indol-3-yl)(4-methoxyphenyl)methyl)malononitrile**

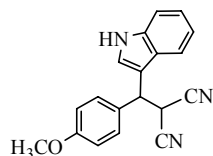

Following the general procedure the title compound was isolated by flash chromatography (eluent: ethyl acetate/petrol ether =1/4) as a pale-yellow solid in 68% yield.

**<sup>1</sup>H NMR (400 MHz, DMSO-*d*<sub>6</sub>)** δ = 11.20(s, 1H), 7.54(d, *J* = 2.4 Hz, 1H), 7.44-7.38(m, 4H), 7.09(t, *J* = 8.0 Hz, 1H), 6.97-6.91(m, 3H), 5.77(d, *J* = 9.2 Hz, 1H), 5.14(d, *J* = 9.2 Hz, 1H), 3.73(s, 3H) ppm.

**<sup>13</sup>C NMR (100 MHz, DMSO-*d*<sub>6</sub>)** δ = 159.2, 136.6, 131.6, 129.7, 126.4, 123.0, 122.1, 119.3, 119.1, 114.6, 114.4, 113.1, 112.1, 55.5, 42.3, 29.4 ppm.

**MS (EI, m/z):** 301 [M<sup>+</sup>]

### 2-((1H-indol-3-yl)(3-methoxyphenyl)methyl)malononitrile

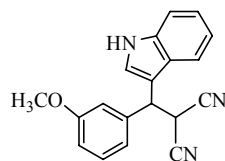

Following the general procedure the title compound was isolated by flash chromatography (eluent: ethyl acetate/petrol ether =1/4) as a pale-yellow solid in 76% yield.

**<sup>1</sup>H NMR (400 MHz, DMSO-*d*<sub>6</sub>)**  $\delta$  = 11.23(s, 1H), 7.58(s, 1H), 7.54(d, *J* = 8.0 Hz, 1H), 7.41(d, *J* = 8.4 Hz, 1H), 7.30(t, *J* = 7.6 Hz, 1H), 7.12(d, *J* = 6.8 Hz, 2H), 7.10(s, 1H), 6.99(t, *J* = 7.2 Hz, 1H), 6.87(d, *J* = 8.0 Hz, 1H), 5.88(d, *J* = 9.6 Hz, 1H), 5.36(d, *J* = 9.2 Hz, 1H), 3.74(s, 3H) ppm.

**<sup>13</sup>C NMR (100 MHz, DMSO-*d*<sub>6</sub>)**  $\delta$  = 159.8, 141.3, 136.5, 130.2, 126.4, 123.2, 122.2, 120.6, 119.4, 119.1, 114.7, 114.6, 114.3, 113.1, 112.8, 112.2, 55.5, 42.9, 29.0 ppm.

**MS (EI, *m/z*):** 301 [M<sup>+</sup>]

### 2-((1H-indol-3-yl)(*p*-tolyl)methyl)malononitrile

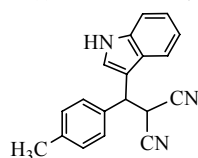

Following the general procedure the title compound was isolated by flash chromatography (eluent: ethyl acetate/petrol ether =1/4) as a pale-yellow solid in 73% yield.

**<sup>1</sup>H NMR (400 MHz, DMSO-*d*<sub>6</sub>)**  $\delta$  = 11.21(s, 1H), 7.55(d, *J* = 2.4 Hz, 1H), 7.46(d, *J* = 8.0 Hz, 1H), 7.39(d, *J* = 7.6 Hz, 3H), 7.17(d, *J* = 8.0 Hz, 2H), 7.10(t, *J* = 7.6 Hz, 1H), 6.95(t, *J* = 7.6 Hz, 1H), 5.81(d, *J* = 9.2 Hz, 1H), 5.16(d, *J* = 9.2 Hz, 1H), 2.27(s, 3H) ppm.

**<sup>13</sup>C NMR (100 MHz, DMSO-*d*<sub>6</sub>)**  $\delta$  = 137.5, 136.7, 136.6, 129.6, 128.4, 126.4, 123.1, 122.1, 119.3, 119.1, 114.6, 114.4, 113.0, 112.1, 42.6, 29.2, 21.1 ppm.

**MS (EI, *m/z*):** 285 [M<sup>+</sup>]

### 2-((1H-indol-3-yl)(*m*-tolyl)methyl)malononitrile

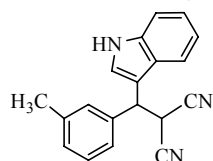

Following the general procedure the title compound was isolated by flash chromatography (eluent: ethyl acetate/petrol ether =1/4) as a pale-yellow solid in 82% yield.

**<sup>1</sup>H NMR (400 MHz, DMSO-*d*<sub>6</sub>)**  $\delta$  = 11.21(s, 1H), 7.55(d, *J* = 1.6 Hz, 1H), 7.50(d, *J* = 8.0 Hz, 1H), 7.39(d, *J* = 8.4 Hz, 1H), 7.33(d, *J* = 6.8 Hz, 2H), 7.25(t, *J* = 7.6 Hz, 1H), 7.09(t, *J* = 7.2 Hz, 2H), 6.96(t, *J* = 7.6 Hz, 1H), 5.83(d, *J* = 9.6 Hz, 1H), 5.16(d, *J* = 9.2 Hz, 1H), 2.28(s, 3H) ppm.

**<sup>13</sup>C NMR (100 MHz, DMSO-*d*<sub>6</sub>)**  $\delta$  = 139.2, 137.7, 136.0, 128.5, 128.4, 125.9, 125.0, 122.7, 121.6, 118.9, 118.6, 114.1, 113.9, 112.4, 111.6, 42.4, 28.6, 21.1 ppm.

**MS (EI, *m/z*):** 285 [M<sup>+</sup>]

### 2-((4-fluorophenyl)(1H-indol-3-yl)methyl)malononitrile

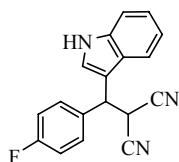

Following the general procedure the title compound was isolated by flash chromatography (eluent: ethyl acetate/petrol ether =1/4) as a pale-yellow solid in 87% yield.

**<sup>1</sup>H NMR (400 MHz, DMSO-*d*<sub>6</sub>)** δ = 11.27(s, 1H), 7.5973-7.56(m, 3H), 7.47(d, *J* = 8.0 Hz, 1H), 7.41(t, *J* = 8.4 Hz, 1H), 7.23(t, *J* = 8.8 Hz, 2H), 7.11(t, *J* = 7.6 Hz, 1H), 6.98(t, *J* = 7.6 Hz, 1H), 5.86(d, *J* = 9.2 Hz, 1H), 5.29(d, *J* = 9.2 Hz, 1H) ppm.

**<sup>13</sup>C NMR (100 MHz, DMSO-*d*<sub>6</sub>)** δ = 163.3, 160.9, 136.6, 135.9, 135.9, 130.7, 130.6, 126.3, 123.2, 122.2, 119.5, 119.0, 116.1, 115.8, 114.5, 114.2, 112.7, 112.2, 42.1, 29.2 ppm.

**MS (EI, *m/z*):** 289 [M<sup>+</sup>]

### 2-((4-chlorophenyl)(1H-indol-3-yl)methyl)malononitrile

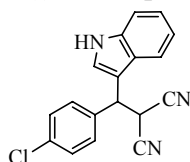

Following the general procedure the title compound was isolated by flash chromatography (eluent: ethyl acetate/petrol ether =1/4) as a white solid in 93% yield.

**<sup>1</sup>H NMR (400 MHz, DMSO-*d*<sub>6</sub>)** δ = 11.26 (s, 1H), 7.57(d, *J* = 2.4 Hz, 1H), 7.54(d, *J* = 8.0 Hz, 2H), 7.45(d, *J* = 8.4 Hz, 3H), 7.39(d, *J* = 8.4 Hz, 1H), 7.10(t, *J* = 7.6 Hz, 1H), 6.97(t, *J* = 7.6 Hz, 1H), 5.86(d, *J* = 9.2 Hz, 1H), 5.284(d, *J* = 9.2 Hz, 1H) ppm.

**<sup>13</sup>C NMR (100 MHz, DMSO-*d*<sub>6</sub>)** δ = 138.7, 136.6, 133.0, 130.4, 129.1, 126.3, 123.3, 122.2, 119.5, 119.0, 114.4, 114.2, 112.4, 112.2, 42.1, 29.0 ppm.

**MS (EI, *m/z*):** 305 [M<sup>+</sup>]

### 2-((2-chlorophenyl)(1H-indol-3-yl)methyl)malononitrile

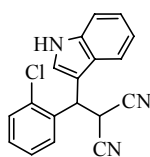

Following the general procedure the title compound was isolated by flash chromatography (eluent: ethyl acetate/petrol ether =1/4) as a white solid in 91% yield.

**<sup>1</sup>H NMR (400 MHz, DMSO-*d*<sub>6</sub>)** δ = 11.31 (bs, 1H), 7.65-7.63(m, 1H), 7.55(t, 2H), 7.48(d, *J* = 8.0 Hz, 1H), 7.40(t, 2H), 7.36-7.32(m, 1H), 7.12(t, *J* = 7.2 Hz, 1H), 7.00(t, *J* = 7.6 Hz, 1H), 5.96(d, *J* = 10.0 Hz, 1H), 5.58(d, *J* = 9.6 Hz, 1H) ppm.

**<sup>13</sup>C NMR (100 MHz, DMSO-*d*<sub>6</sub>)** δ = 136.7, 136.5, 133.5, 130.4, 130.1, 129.5, 128.3, 126.2, 124.1, 122.3, 119.7, 118.6, 114.1, 113.9, 112.3, 111.6, 28.4 ppm.

**MS (EI, *m/z*):** 305 [M<sup>+</sup>]

### 2-((4-bromophenyl)(1H-indol-3-yl)methyl)malononitrile

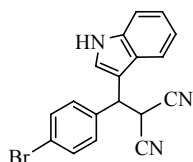

Following the general procedure the title compound was isolated by flash chromatography (eluent: ethyl acetate/petrol ether =1/4) as a yellow solid in 89% yield.

**<sup>1</sup>H NMR (400 MHz, DMSO-*d*<sub>6</sub>)**  $\delta$  = 7.98 (s, 1H), 7.41 (d, *J* = 8.3 Hz, 2H), 7.23-7.20 (m, 4H), 7.10 (t, *J* = 7.2 Hz, 1H), 6.97 (t, *J* = 7.6 Hz, 1H), 4.81 (d, *J* = 9.4 Hz, 1H), 4.54 (d, *J* = 9.4 Hz, 1H), 2.34 (s, 3H) ppm.

**<sup>13</sup>C NMR (100 MHz, DMSO-*d*<sub>6</sub>)**  $\delta$  = 139.1, 136.6, 132.1, 130.8, 126.3, 123.3, 122.2, 121.6, 119.5, 119.0, 114.4, 114.2, 112.3, 112.2, 42.2, 28.9 ppm.

**MS (EI, *m/z*):** 349 [M<sup>+</sup>]

### 2-((1H-indol-3-yl)(naphthalen-1-yl)methyl)malononitrile

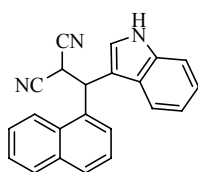

Following the general procedure the title compound was isolated by flash chromatography (eluent: ethyl acetate/petrol ether =1/4) as a white solid in 84% yield.

**<sup>1</sup>H NMR (400 MHz, DMSO-*d*<sub>6</sub>)**  $\delta$  = 11.19 (s, 1H), 8.49 (d, *J* = 8.0 Hz, 1H), 7.96 (t, 1H), 7.91 (d, *J* = 8.0 Hz, 1H), 7.77 (d, *J* = 7.2 Hz, 1H), 7.59-7.51 (m, 4H), 7.47 (d, *J* = 2.4 Hz, 1H), 7.35 (d, *J* = 8.4 Hz, 1H), 7.06 (t, *J* = 7.6 Hz, 1H), 6.93 (t, *J* = 8.0 Hz, 1H), 6.15 (d, *J* = 9.6 Hz, 1H), 5.99 (d, *J* = 9.6 Hz, 1H) ppm.

**<sup>13</sup>C NMR (100 MHz, DMSO-*d*<sub>6</sub>)**  $\delta$  = 136.6, 135.5, 134.1, 131.4, 129.3, 128.7, 127.1, 126.4, 126.2, 125.8, 125.1, 124.6, 124.0, 122.0, 119.4, 119.1, 114.6, 113.0, 112.2, 38.1, 29.0 ppm.

**MS (EI, *m/z*):** 308 [M<sup>+</sup>]

### 2-(1-(1H-indol-3-yl)-2,2-dimethylpropyl)malononitrile

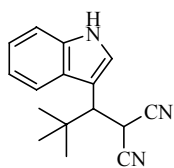

Following the general procedure the title compound was isolated by flash chromatography (eluent: ethyl acetate/petrol ether =1/4) as a yellow solid in 88% yield.

**<sup>1</sup>H NMR (400 MHz, CDCl<sub>3</sub>)**  $\delta$  = 8.41 (s, 1H), 7.62 (d, *J* = 7.6 Hz, 1H), 7.57 (d, *J* = 1.6 Hz, 1H), 7.43 (d, *J* = 7.6 Hz, 1H), 7.29-7.25 (m, 1H), 7.21 (t, *J* = 7.6 Hz, 1H), 4.30 (d, *J* = 8.4 Hz, 1H), 3.57 (d, *J* = 4.0 Hz, 1H), 1.58 (s, 9H) ppm

**<sup>13</sup>C NMR (100 MHz, CDCl<sub>3</sub>)**  $\delta$  = 135.1, 128.5, 122.7, 120.2, 118.2, 114.0, 113.5, 111.4, 111.1, 47.8, 35.7, 28.3, 26.0 ppm.

**MS (EI, *m/z*):** 251 [M<sup>+</sup>]

### 2-((2-methyl-1H-indol-3-yl)(phenyl)methyl)malononitrile

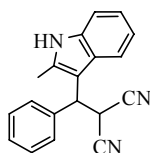

Following the general procedure the title compound was isolated by flash chromatography (eluent: ethyl acetate/petrol ether =1/4) as a yellow solid in 92% yield.

**<sup>1</sup>H NMR (400 MHz, DMSO-*d*<sub>6</sub>)** δ = 11.31(s, 1H), 7.57(d, *J* = 8.0 Hz, 1H), 7.52(d, *J* = 7.6 Hz, 2H), 7.38(t, *J* = 7.6 Hz, 2H), 7.30-7.25(m, 2H), 7.02(t, *J* = 7.2 Hz, 1H), 6.92(t, *J* = 7.6 Hz, 1H), 6.03(d, *J* = 10.8 Hz, 1H), 5.23(d, *J* = 10.8 Hz, 1H), 2.51(s, 3H) ppm

**<sup>13</sup>C NMR (100 MHz, DMSO-*d*<sub>6</sub>)** δ = 139.4, 135.9, 134.8, 129.0, 128.0, 127.7, 126.3, 120.9, 119.2, 118.9, 114.8, 114.5, 111.3, 108.0, 43.0, 27.6, 12.2 ppm.

**MS (EI, *m/z*):** 285 [M<sup>+</sup>]

### 2-((2-methyl-1H-indol-3-yl)(4-nitrophenyl)methyl)malononitrile

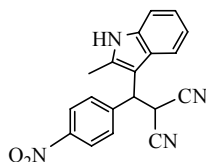

Following the general procedure the title compound was isolated by flash chromatography (eluent: ethyl acetate/petrol ether =1/4) as a yellow solid in 95% yield.

**<sup>1</sup>H NMR (400 MHz, DMSO-*d*<sub>6</sub>)** δ = 11.24(s, 1H), 8.27(d, *J* = 8.4 Hz, 2H), 7.79(d, *J* = 8.4 Hz, 2H), 7.53(d, *J* = 8.0 Hz, 1H), 7.30(d, *J* = 8.0 Hz, 1H), 7.03(t, *J* = 7.2 Hz, 1H), 6.93(t, *J* = 7.6 Hz, 1H), 6.13(d, *J* = 10.4 Hz, 1H), 5.51(d, *J* = 10.4 Hz, 1H), 2.54(s, 3H) ppm.

**<sup>13</sup>C NMR (100 MHz, DMSO-*d*<sub>6</sub>)** δ = 147.1, 146.8, 135.9, 135.5, 129.3, 126.0, 124.2, 121.1, 119.5, 118.6, 114.4, 114.1, 111.5, 106.8, 42.6, 27.3, 12.2 ppm.

**MS (EI, *m/z*):** 330 [M<sup>+</sup>]

### 2-((2-methyl-1H-indol-3-yl)(3-nitrophenyl)methyl)malononitrile

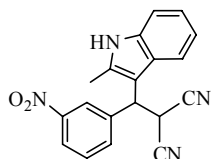

Following the general procedure the title compound was isolated by flash chromatography (eluent: ethyl acetate/petrol ether =1/4) as a yellow solid in 94% yield.

**<sup>1</sup>H NMR (400 MHz, DMSO-*d*<sub>6</sub>)** δ = 11.24(s, 1H), 8.41(s, 1H), 8.17-8.15(m, 1H), 8.00(d, *J* = 8.0 Hz, 1H), 7.70(t, *J* = 8.0 Hz, 1H), 7.58(d, *J* = 8.0 Hz, 1H), 7.31(d, *J* = 8.0 Hz, 1H), 7.04(t, *J* = 7.6 Hz, 1H), 6.95(t, *J* = 7.6 Hz, 1H), 6.18(d, *J* = 10.8 Hz, 1H), 5.52(d, *J* = 10.8 Hz, 1H), 2.54(s, 3H) ppm.

**<sup>13</sup>C NMR (100 MHz, DMSO-*d*<sub>6</sub>)** δ = 148.3, 141.6, 135.9, 135.5, 134.8, 130.7, 126.1, 122.9, 122.7, 121.2, 119.5, 118.6, 114.4, 114.1, 111.6, 106.8, 42.4, 27.6, 12.2 ppm.

**MS (EI, *m/z*):** 330 [M<sup>+</sup>]

### 2-((3-methoxyphenyl)(2-methyl-1H-indol-3-yl)methyl)malononitrile



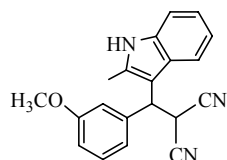

Following the general procedure the title compound was isolated by flash chromatography (eluent: ethyl acetate/petrol ether =1/4) as a buff solid in 82% yield.

**<sup>1</sup>H NMR (400 MHz, DMSO-*d*<sub>6</sub>)** δ = 11.13(s, 1H), 7.62(d, *J* = 8.0 Hz, 1H), 7.31-7.28(m, 2H), 7.09(d, *J* = 8.0 Hz, 2H), 7.03(t, *J* = 7.2 Hz, 1H), 6.93(t, *J* = 7.6 Hz, 1H), 6.84(t, *J* = 7.6 Hz, 1H), 6.03(d, *J* = 10.8 Hz, 1H), 5.19(d, *J* = 10.8 Hz, 1H), 3.73(s, 3H), 2.51(s, 3H) ppm

**<sup>13</sup>C NMR (100 MHz, CDCl<sub>3</sub>)** δ = 159.7, 140.9, 135.9, 134.8, 130.1, 126.3, 120.9, 120.3, 119.2, 118.9, 114.8, 114.3, 112.5, 111.4, 107.9, 55.5, 43.0, 27.6, 12.2 ppm

**MS (EI, m/z):** 315 [M<sup>+</sup>]

### 2-((2-methyl-1H-indol-3-yl)(m-tolyl)methyl)malononitrile

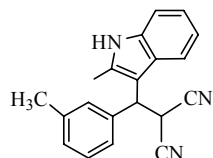

Following the general procedure the title compound was isolated by flash chromatography (eluent: ethyl acetate/petrol ether =1/4) as a white solid in 85% yield.

**<sup>1</sup>H NMR (400 MHz, DMSO-*d*<sub>6</sub>)** δ = 11.10(s, 1H), 7.56(d, *J* = 8.0 Hz, 1H), 7.34(d, *J* = 8.0 Hz, 1H), 7.27(d, *J* = 6.8 Hz, 3H), 7.08(d, *J* = 7.6 Hz, 1H), 7.01(t, *J* = 7.2 Hz, 1H), 6.91(t, *J* = 7.6 Hz, 1H), 5.99(d, *J* = 10.8 Hz, 1H), 5.16(d, *J* = 10.8 Hz, 1H), 2.50(s, 3H), 2.28(s, 3H) ppm.

**<sup>13</sup>C NMR (100 MHz, DMSO-*d*<sub>6</sub>)** δ = 139.3, 138.1, 135.8, 134.7, 128.8, 128.4, 126.3, 124.7, 120.9, 119.2, 118.9, 114.8, 114.5, 111.3, 108.1, 43.0, 27.6, 21.6, 21.5, 12.2 ppm.

**MS (EI, m/z):** 299 [M<sup>+</sup>]

### 2-((2-methyl-1H-indol-3-yl)(p-tolyl)methyl)malononitrile

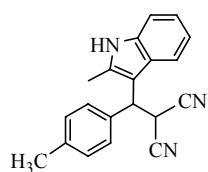

Following the general procedure the title compound was isolated by flash chromatography (eluent: ethyl acetate/petrol ether =1/8) as a yellow solid in 83% yield.

**<sup>1</sup>H NMR (400 MHz, CDCl<sub>3</sub>)** δ = 8.05(s, 1H), 7.38(s, 1H), 7.36(d, *J* = 4.0 Hz, 1H), 7.31(t, *J* = 9.2 Hz, 3H), 7.21(s, 1H), 7.18(d, *J* = 3.6 Hz, 1H), 7.15(d, *J* = 8.0 Hz, 1H), 7.07(t, *J* = 7.6 Hz, 1H), 4.95(d, *J* = 9.6 Hz, 1H), 4.69(d, *J* = 9.6 Hz, 1H), 2.48(s, 3H), 2.36(s, 3H) ppm.

**<sup>13</sup>C NMR (100 MHz, CDCl<sub>3</sub>)** δ = 137.8, 135.4, 134.1, 133.8, 129.7, 127.3, 126.2, 121.8, 120.1, 118.3, 112.8, 110.9, 108.1, 44.0, 27.8, 21.0, 12.4 ppm.

**MS (EI, m/z):** 299 [M<sup>+</sup>]

### 2-((1-methyl-1H-indol-3-yl)(phenyl)methyl)malononitrile

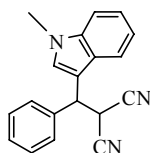

Following the general procedure the title compound was isolated by flash chromatography (eluent: ethyl acetate/petrol ether =1/8) as a dark yellow solid in 77% yield.

**<sup>1</sup>H NMR (400 MHz, DMSO-*d*<sub>6</sub>)**  $\delta$  = 7.52(t, 4H), 7.43(d, *J* = 8.0 Hz, 1H), 7.38(t, *J* = 7.6 Hz, 2H), 7.30(t, *J* = 7.2 Hz, 1H), 7.17(t, *J* = 7.2 Hz, 1H), 7.01(t, *J* = 7.6 Hz, 1H), 5.82(d, *J* = 9.2 Hz, 1H), 5.23(d, *J* = 9.2 Hz, 1H), 3.82(s, 3H) ppm

**<sup>13</sup>C NMR (100 MHz, DMSO-*d*<sub>6</sub>)**  $\delta$  = 139.6, 137.0, 129.1, 128.5, 127.5, 126.7, 122.3, 119.5, 119.3, 114.5, 114.3, 112.1, 110.4, 42.7, 33.1, 29.2 ppm.

**MS (EI, *m/z*):** 285 [M<sup>+</sup>]

### 2-((1-methyl-1H-indol-3-yl)(4-nitrophenyl)methyl)malononitrile

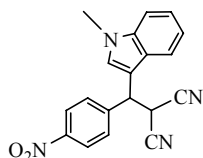

Following the general procedure the title compound was isolated by flash chromatography (eluent: ethyl acetate/petrol ether =1/8) as a yellow solid in 83% yield.

**<sup>1</sup>H NMR (400 MHz, DMSO-*d*<sub>6</sub>)**  $\delta$  = 8.26(d, *J* = 8.4 Hz, 2H), 7.81(d, *J* = 8.4 Hz, 2H), 7.58(s, 1H), 7.54(d, *J* = 8.0 Hz, 1H), 7.45(d, *J* = 8.4 Hz, 1H), 7.19(t, *J* = 7.2 Hz, 1H), 7.03(t, *J* = 7.6 Hz, 1H), 5.97(d, *J* = 9.2 Hz, 1H), 5.53(d, *J* = 9.2 Hz, 1H), 2.51(s, 3H) ppm.

**<sup>13</sup>C NMR (100 MHz, DMSO-*d*<sub>6</sub>)**  $\delta$  = 147.5, 147.0, 137.0, 129.9, 127.8, 126.6, 124.4, 122.5, 119.8, 119.1, 114.0, 110.9, 110.6, 42.1, 33.2, 28.6 ppm.

**MS (EI, *m/z*):** 330 [M<sup>+</sup>]

### 2-((1-methyl-1H-indol-3-yl)(3-nitrophenyl)methyl)malononitrile

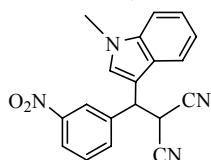

Following the general procedure the title compound was isolated by flash chromatography (eluent: ethyl acetate/petrol ether =1/8) as a yellow solid in 80% yield.

**<sup>1</sup>H NMR (400 MHz, DMSO-*d*<sub>6</sub>)**  $\delta$  = 8.45(s, 1H), 8.22(t, *J* = 8.4 Hz, 1H), 8.01(d, *J* = 8.0 Hz, 1H), 7.73-7.69(m, 1H), 7.62(s, 1H), 7.56(d, *J* = 8.0 Hz, 1H), 7.45(d, *J* = 8.4 Hz, 1H), 7.19(t, *J* = 7.2 Hz, 1H), 7.04(t, *J* = 7.6 Hz, 1H), 5.99(d, *J* = 9.2 Hz, 1H), 5.56(d, *J* = 9.2 Hz, 1H), 3.84(s, 3H) ppm.

**<sup>13</sup>C NMR (100 MHz, DMSO-*d*<sub>6</sub>)**  $\delta$  = 147.9, 141.3, 134.8, 130.4, 130.2, 127.3, 126.1, 124.2, 122.9, 122.8, 122.0, 119.3, 118.6, 110.5, 110.1, 41.4, 32.8, 28.3 ppm.

**MS (EI, *m/z*):** 330 [M<sup>+</sup>]

## 5. References

1. (a) Bhattacharjee, S.; Dines, T. J.; Anderson, J. A. J. *Catal.* 2004, 225, 398–407; (b) Choudary, B. M.; Ramani, T.;

- Maheswaran, H.; Pra-shant, L.; Ranganath, K. V. S.; Vijaykumar, K. *Adv. Synth. Catal.* 2006, 348, 493–498;  
(c) Tan, R.; Yin, D. H.; Yu, N. Y.; Tao, L.; Fu, Z. H.; Yin, D. L. *J. Mol. Catal. A: Chem.* 2006, 259, 125–132.
2. (a) Larrow, J. F.; Jacobsen, E. N. *J. Org. Chem.* 1994, 59, 1939–1942; (b) Darensbourg, D. J.; Mackiewicz, R. M.; Rodgers, J. L.; Fang, C. C.; Billodeaux, D. R.; Reibenspies, J. H. *Inorg. Chem.* 2004, 43, 6024–6034.

### 6. $^1\text{H}$ NMR and $^{13}\text{C}$ NMR spectral for the products

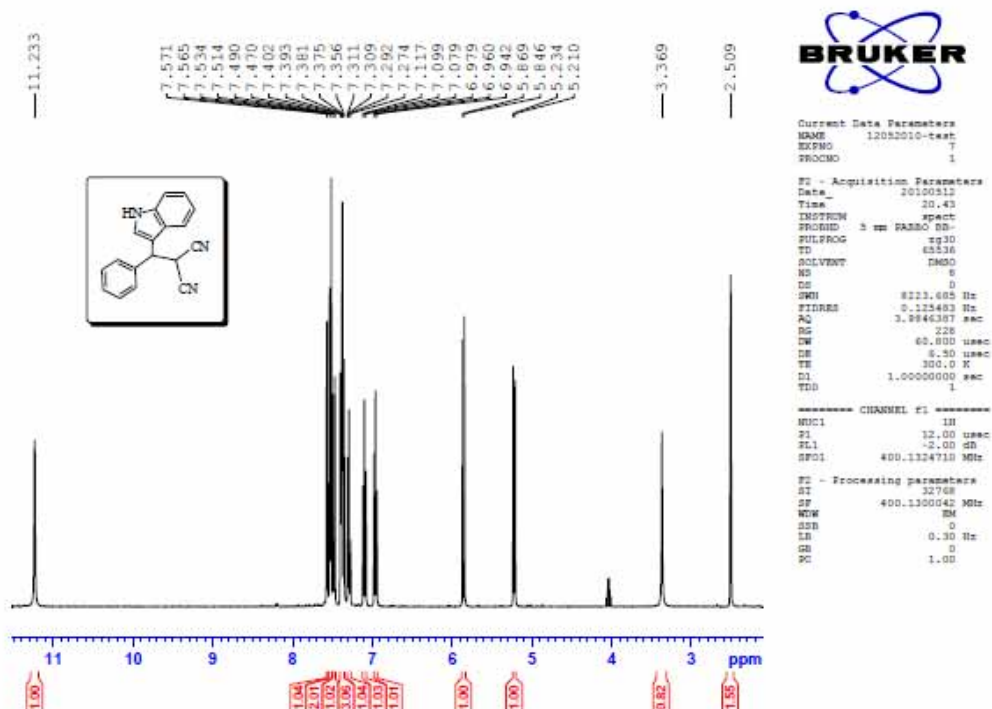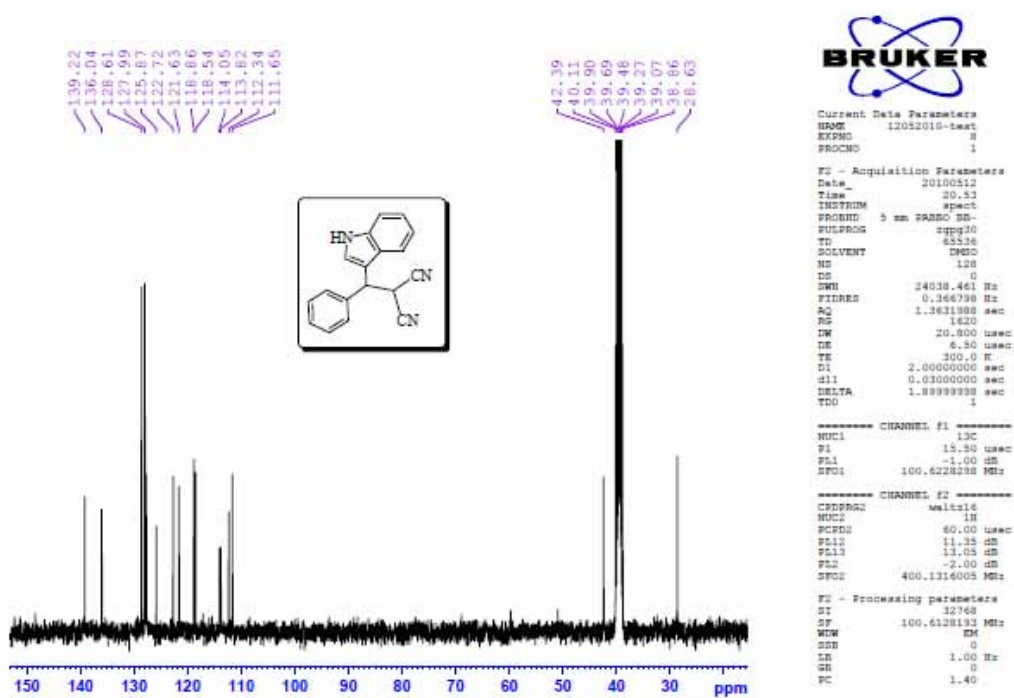

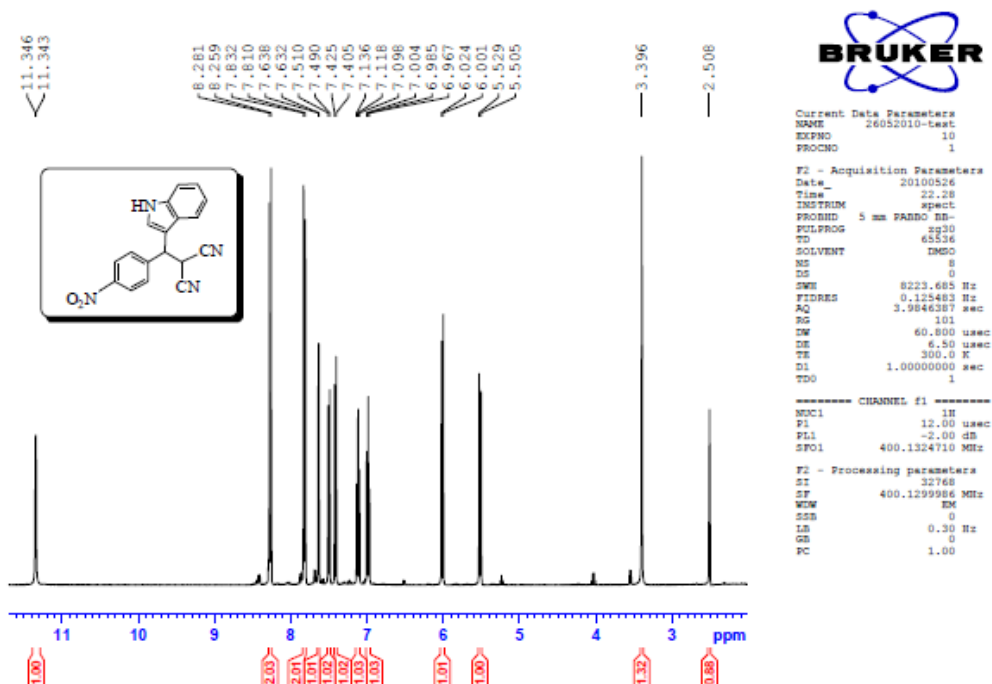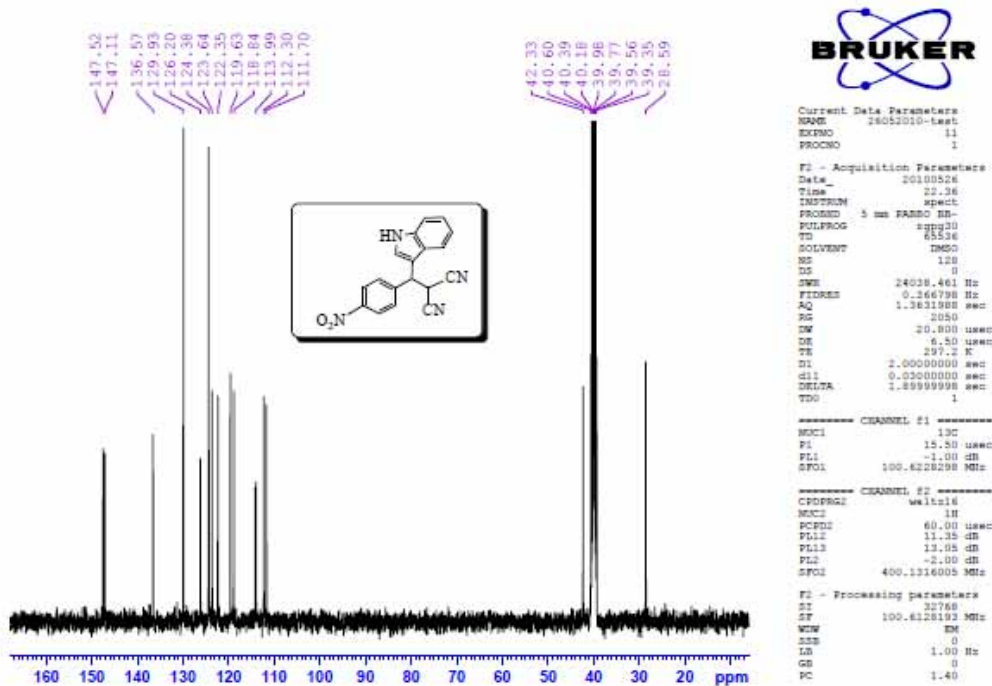

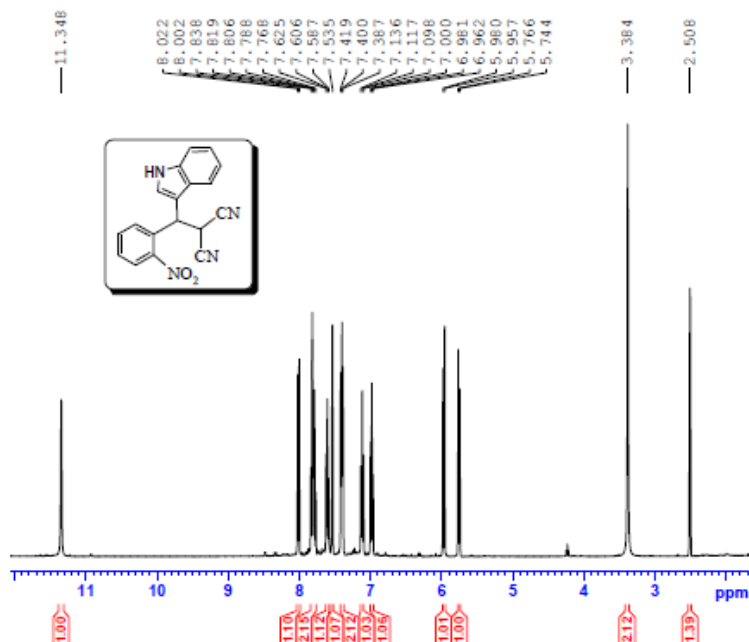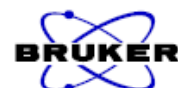

Current Data Parameters  
NAME 19052010-test  
EXPRNO 3  
PROCNO 1

F2 - Acquisition Parameters  
Date\_ 20100519  
Time 21.06  
INSTRUM spect  
PROBHD 5 mm PABBO BB-  
PULPROG zg30  
TD 65536  
SOLVENT DMF0  
NS 16  
DS 0  
SWH 8223.485 Hz  
FIDRES 0.125483 Hz  
AQ 3.9846387 sec  
RG 203  
DW 60.800 usec  
DE 6.50 usec  
TE 300.0 K  
D1 1.00000000 sec  
TDO 1

----- CHANNEL f1 -----  
NUC1 1H  
P1 12.00 usec  
PL1 -2.00 dB  
SFO1 400.1324710 MHz

F2 - Processing parameters  
SI 32768  
SF 400.1299853 MHz  
WDW EM  
SSB 0  
LB 0.30 Hz  
GB 0  
PC 1.00

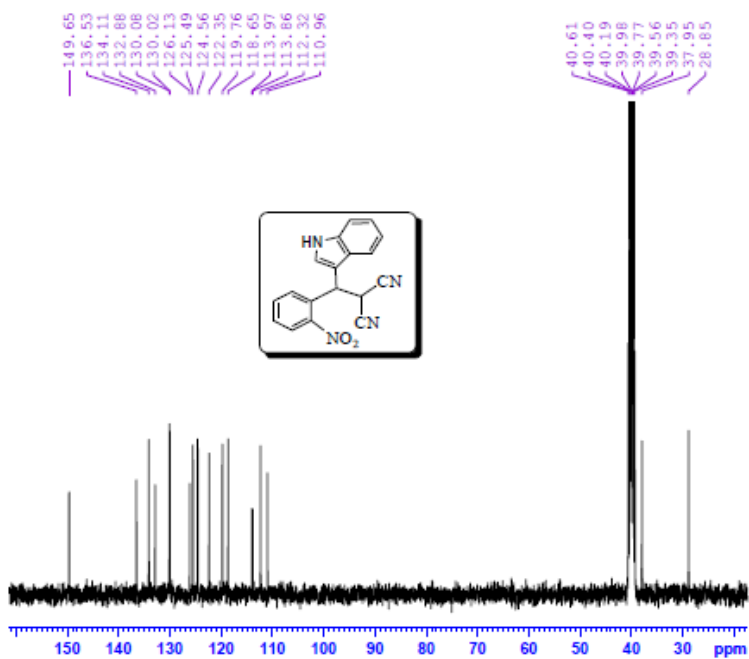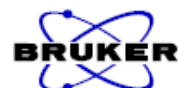

Current Data Parameters  
NAME 19052010-test  
EXPRNO 4  
PROCNO 1

F2 - Acquisition Parameters  
Date\_ 20100519  
Time 21.15  
INSTRUM spect  
PROBHD 5 mm PABBO BB-  
PULPROG zgpg30  
TD 65536  
SOLVENT DMF0  
NS 128  
DS 0  
SWH 24038.461 Hz  
FIDRES 0.366798 Hz  
AQ 1.3631988 sec  
RG 2050  
DW 20.800 usec  
DE 6.50 usec  
TE 300.0 K  
D1 2.00000000 sec  
d11 0.03000000 sec  
DELTA 1.89999998 sec  
TDO 1

----- CHANNEL f1 -----  
NUC1 13C  
P1 15.50 usec  
PL1 -1.00 dB  
SFO1 100.6228298 MHz

----- CHANNEL f2 -----  
CPDPRG2 waltz16  
NUC2 1H  
PCPD2 60.00 usec  
PL12 11.35 dB  
PL13 13.05 dB  
PL2 -2.00 dB  
SFO2 400.1316005 MHz

F2 - Processing parameters  
SI 32768  
SF 100.6128193 MHz  
WDW EM  
SSB 0  
LB 1.00 Hz  
GB 0  
PC 1.40

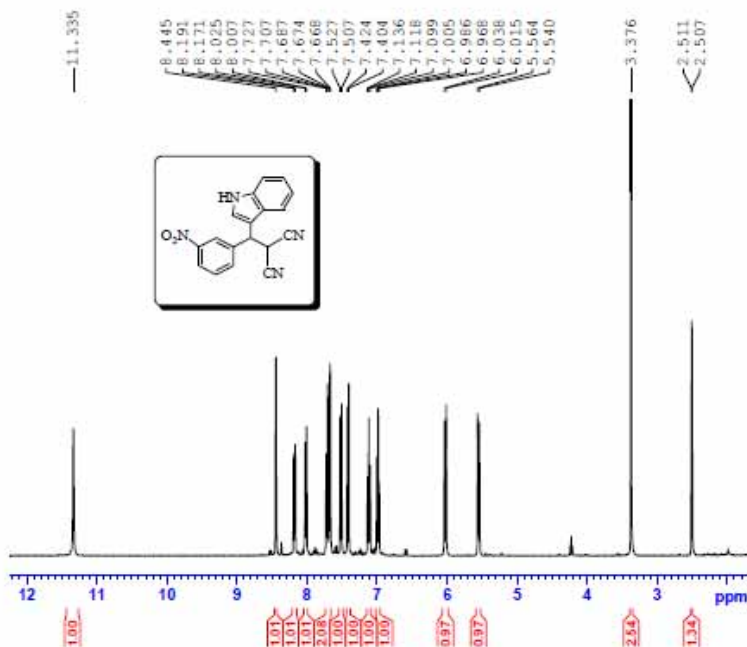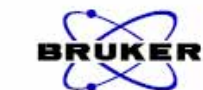

Current Data Parameters  
 NAME 26052010-test  
 EXPNO 7  
 PROCNO 1

F2 - Acquisition Parameters  
 Date\_ 20100526  
 Time 22.12  
 INSTRUM spect  
 PROBRD 5 mm PABBO BB-  
 PULPROG zgpg30  
 TD 65536  
 SOLVENT DMSO  
 NS 0  
 DS 0  
 SWH 8223.685 Hz  
 FIDRES 0.125483 Hz  
 AQ 3.9846287 sec  
 RG 120  
 DW 60.800 usec  
 DE 6.50 usec  
 TE 300.0 K  
 D1 1.00000000 sec  
 TDO 1

----- CHANNEL f1 -----  
 NUC1 1H  
 P1 12.00 usec  
 PL1 -2.00 dB  
 SFO1 400.1124710 MHz

F2 - Processing parameters  
 SI 32768  
 SF 400.1238932 MHz  
 WDW EM  
 SSB 0  
 LB 0.30 Hz  
 GB 0  
 PC 1.00

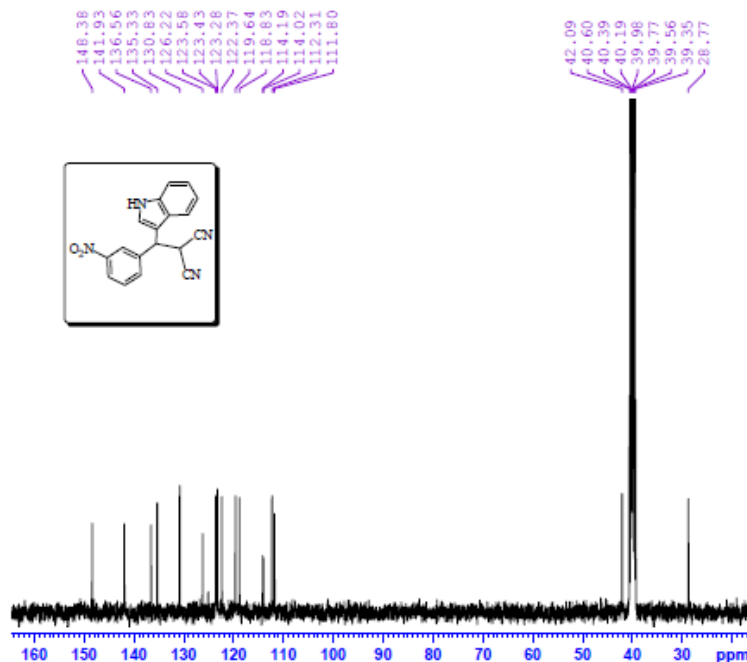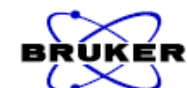

Current Data Parameters  
 NAME 26052010-test  
 EXPNO 8  
 PROCNO 1

F2 - Acquisition Parameters  
 Date\_ 20100526  
 Time 22.20  
 INSTRUM spect  
 PROBRD 5 mm PABBO BB-  
 PULPROG zgpg30  
 TD 65536  
 SOLVENT DMSO  
 NS 128  
 DS 0  
 SWH 24038.461 Hz  
 FIDRES 0.366798 Hz  
 AQ 1.3631988 sec  
 RG 2050  
 DW 20.800 usec  
 DE 6.50 usec  
 TE 300.0 K  
 D1 2.00000000 sec  
 d11 0.03000000 sec  
 DELTA 1.89999998 sec  
 TDO 1

----- CHANNEL f1 -----  
 NUC1 13C  
 P1 15.50 usec  
 PL1 -1.00 dB  
 SFO1 100.6228298 MHz

----- CHANNEL f2 -----  
 CPDPRG2 waltz16  
 NUC2 1H  
 PCPD2 60.00 usec  
 PL12 11.35 dB  
 PL13 13.05 dB  
 PL2 -2.00 dB  
 SFO2 400.1316005 MHz

F2 - Processing parameters  
 SI 32768  
 SF 100.6128193 MHz  
 WDW EM  
 SSB 0  
 LB 1.00 Hz  
 GB 0  
 PC 1.40

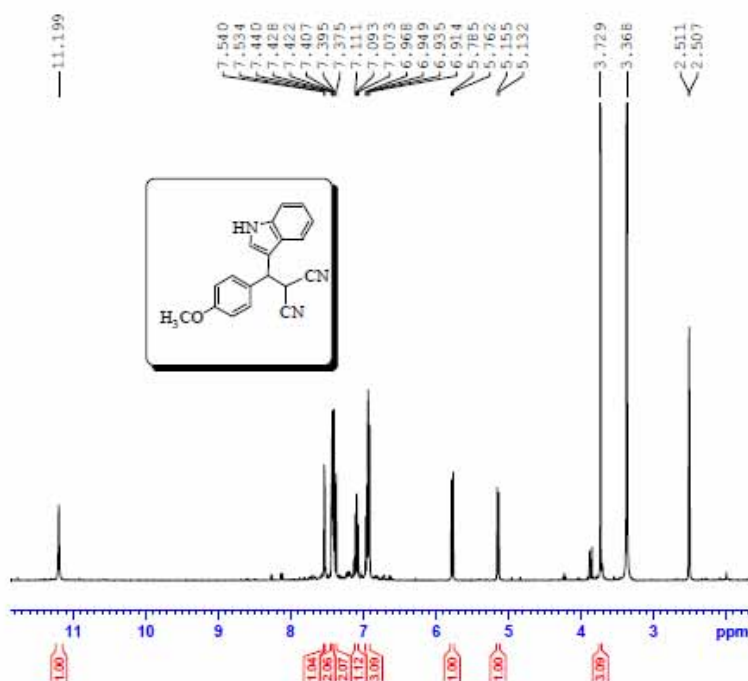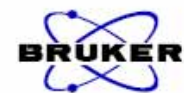

Current Data Parameters  
 NAME 31052010-test  
 EXPNO 4  
 PROCNO 1

F2 - Acquisition Parameters  
 Date\_ 20100531  
 Time\_ 21.42  
 INSTRUM spect  
 PROBHD 5 mm PABBO BB-  
 PULPROG zg30  
 TD 65536  
 SOLVENT DMSO  
 NS 8  
 DS 0  
 SFO1 8223.685 Hz  
 FIDRES 0.125483 Hz  
 AQ 3.9844387 sec  
 RG 226  
 DW 60.800 usec  
 DE 6.50 usec  
 TE 300.0 K  
 D1 1.00000000 sec  
 TD0 1

----- CHANNEL f1 -----  
 NUC1 1H  
 P1 12.00 usec  
 PL1 -2.00 dB  
 SFO1 400.1324710 MHz

F2 - Processing parameters  
 SI 32768  
 SF 400.1299817 MHz  
 WDW EM  
 SSB 0  
 LB 0.30 Hz  
 GB 0  
 PC 1.00

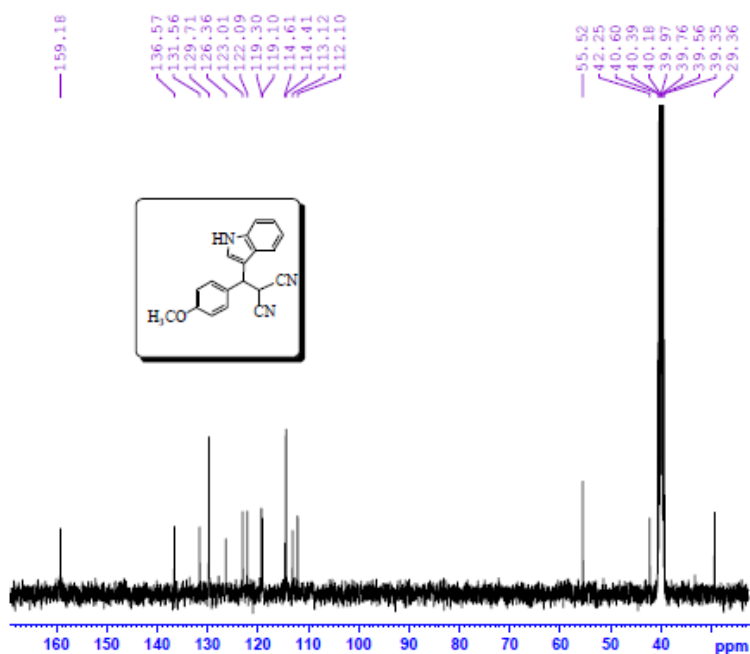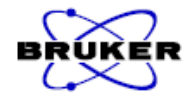

Current Data Parameters  
 NAME 31052010-test  
 EXPNO 7  
 PROCNO 1

F2 - Acquisition Parameters  
 Date\_ 20100531  
 Time\_ 21.51  
 INSTRUM spect  
 PROBHD 5 mm PABBO BB-  
 PULPROG zgpg30  
 TD 65536  
 SOLVENT DMSO  
 NS 128  
 DS 0  
 SFO1 24038.461 Hz  
 FIDRES 0.366798 Hz  
 AQ 1.3631988 sec  
 RG 2050  
 DW 20.800 usec  
 DE 6.50 usec  
 TE 300.0 K  
 D1 2.00000000 sec  
 d11 0.03800000 sec  
 DELTA 1.89999998 sec  
 TD0 1

----- CHANNEL f1 -----  
 NUC1 13C  
 P1 15.50 usec  
 PL1 -1.00 dB  
 SFO1 100.6228298 MHz

----- CHANNEL f2 -----  
 CPDPRG2 waltz16  
 NUC2 1H  
 PCPD2 60.00 usec  
 PL12 11.35 dB  
 PL13 13.05 dB  
 PL2 -2.00 dB  
 SFO2 400.1316005 MHz

F2 - Processing parameters  
 SI 32768  
 SF 100.6128193 MHz  
 WDW EM  
 SSB 0  
 LB 1.00 Hz  
 GB 0  
 PC 1.40



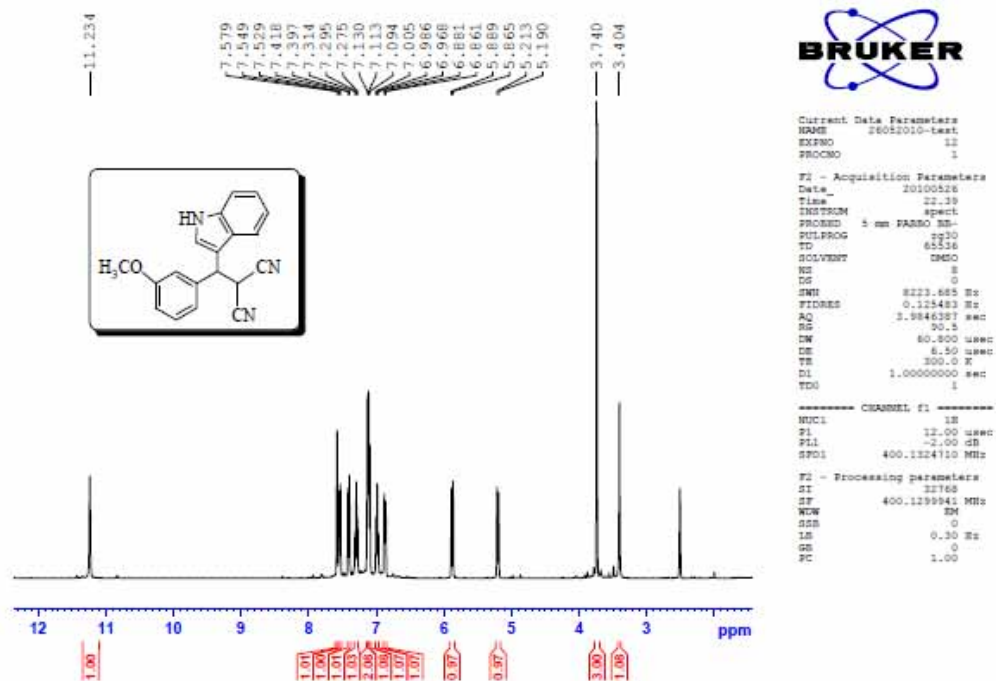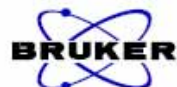

Current Data Parameters  
NAME 26032010-Test  
EXPNO 12  
PROCNO 1

F1 - Acquisition Parameters  
Date\_ 20100526  
Time 22.39  
INSTRUM spect  
PROBHD 5 mm PARO BB-  
PULPROG zg30  
TD 65536  
SOLVENT DMSO  
NS 8  
DS 0  
SWH 823.885 Hz  
FIDRES 0.125483 Hz  
AQ 3.9846387 sec  
RG 50.5  
RW 60.800 usec  
DE 6.50 usec  
TE 300.0 K  
D1 1.00000000 sec  
TD0 1

----- CHANNEL f1 -----  
NUC1 1H  
P1 12.00 usec  
PL1 -2.00 dB  
SFO1 400.124110 MHz

F2 - Processing parameters  
SI 32768  
SF 400.1299841 MHz  
WDW EM  
SSB 0  
LB 0.30 Hz  
GB 0  
PC 1.00

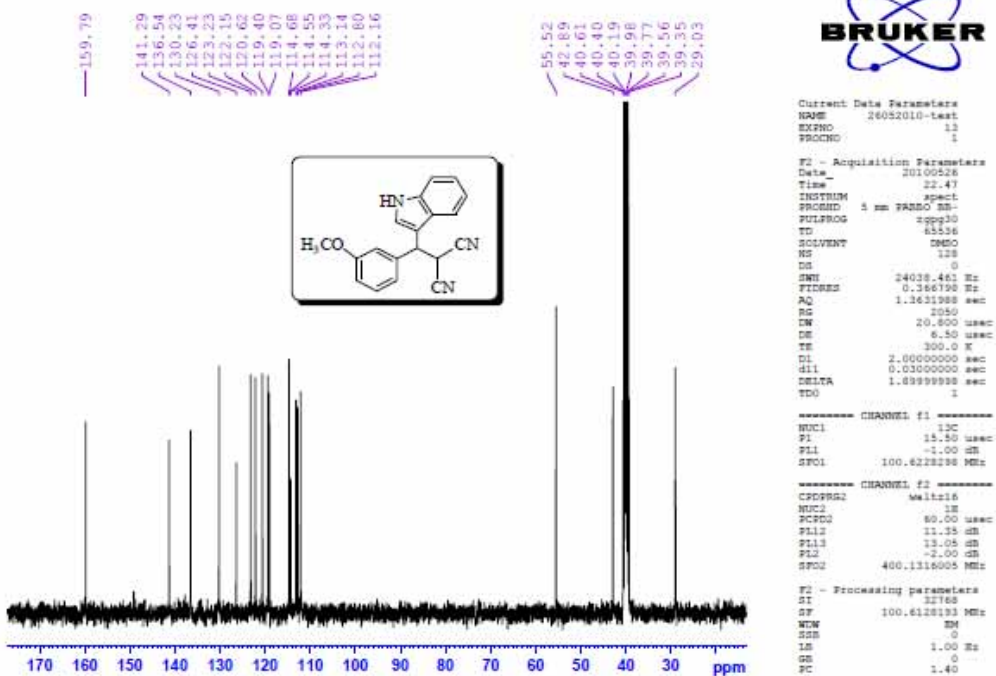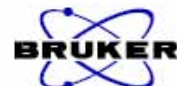

Current Data Parameters  
NAME 26032010-Test  
EXPNO 13  
PROCNO 1

F2 - Acquisition Parameters  
Date\_ 20100526  
Time 22.47  
INSTRUM spect  
PROBHD 5 mm PARO BB-  
PULPROG zgpg30  
TD 65536  
SOLVENT DMSO  
NS 128  
DS 0  
SWH 24038.461 Hz  
FIDRES 0.366790 Hz  
AQ 1.1631988 sec  
RG 2050  
RW 20.800 usec  
DE 6.50 usec  
TE 300.0 K  
D1 2.00000000 sec  
D11 0.03000000 sec  
DELTA 1.89999999 sec  
TD0 1

----- CHANNEL f1 -----  
NUC1 13C  
P1 15.50 usec  
PL1 -1.00 dB  
SFO1 100.6228238 MHz

----- CHANNEL f2 -----  
CPDPRG2 waltz16  
NUC2 1H  
PCPD2 60.00 usec  
PL12 11.35 dB  
PL13 13.05 dB  
PL2 -2.00 dB  
SFO2 400.1316005 MHz

F2 - Processing parameters  
SI 32768  
SF 100.6128193 MHz  
WDW EM  
SSB 0  
LB 1.00 Hz  
GB 0  
PC 1.40

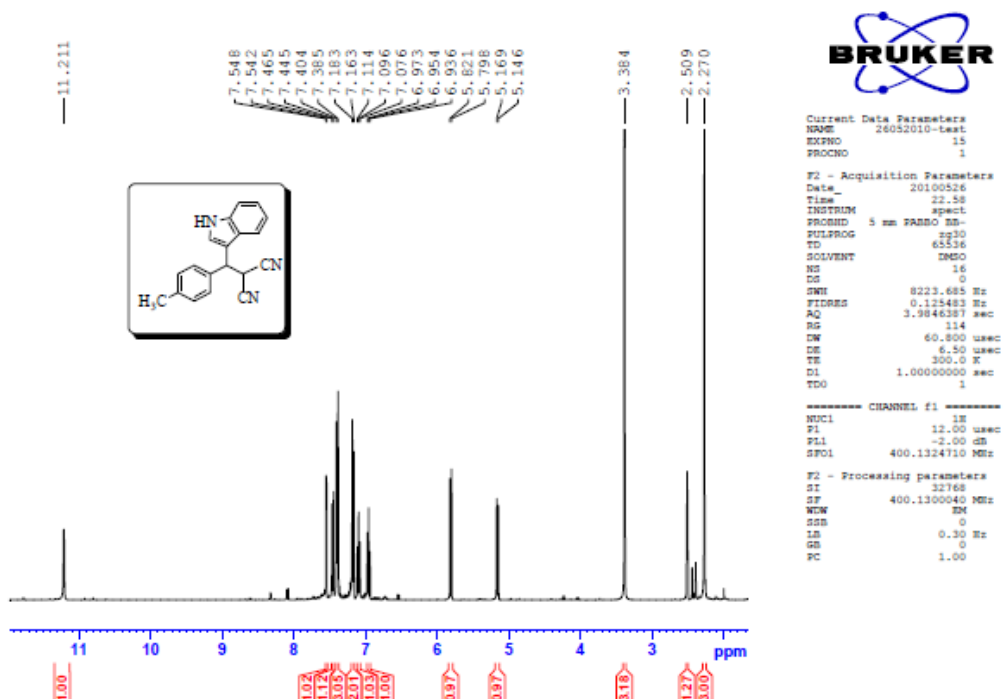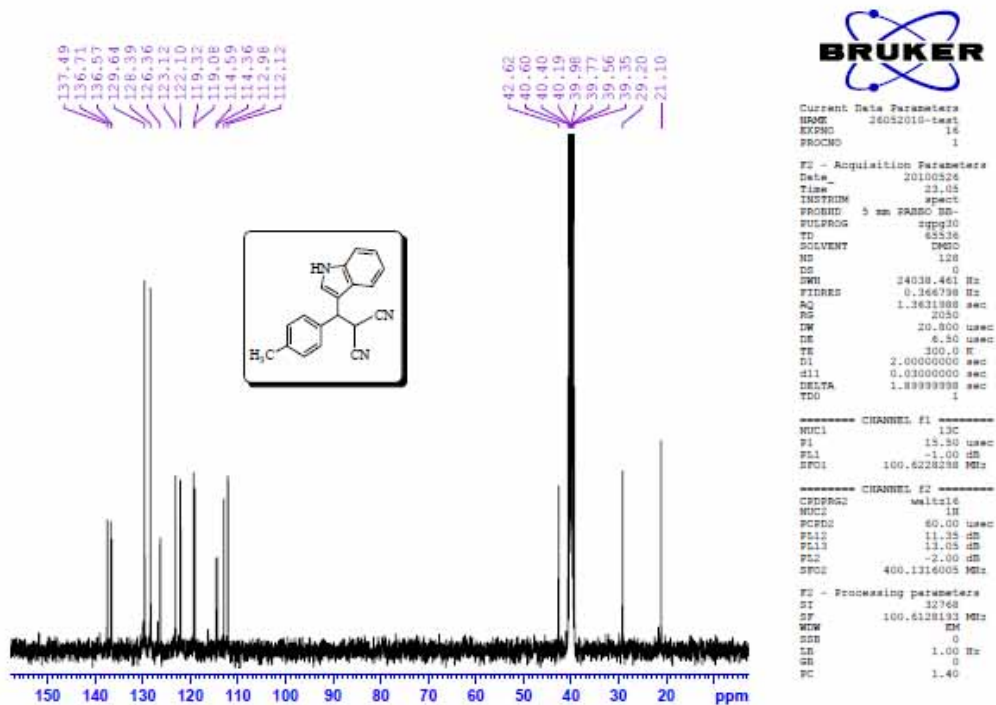

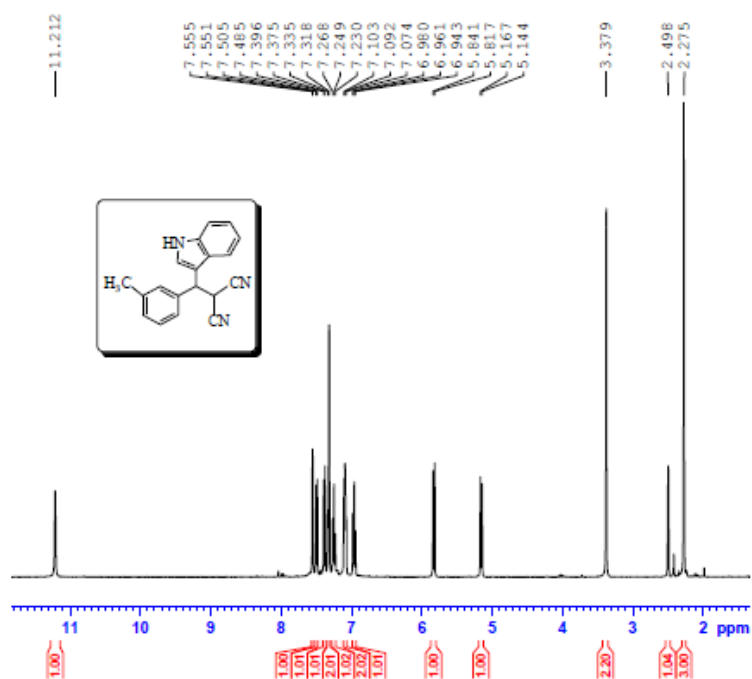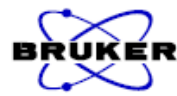

Current Data Parameters  
 NAME 31052010-test  
 EXPNO 4  
 PROCNO 1

F2 - Acquisition Parameters  
 Date\_ 20100531  
 Time 21.29  
 INSTRUM spect  
 PROBHD 5 mm PARBO HP-  
 PULPROG zg30  
 TD 65536  
 SOLVENT dsgd  
 NS 0  
 DS 0  
 SWH 8223.685 Hz  
 FIDRES 0.129483 Hz  
 AQ 3.9846387 sec  
 RG 101  
 DW 60.800 usec  
 DE 6.50 usec  
 TE 300.0 K  
 D1 1.00000000 sec  
 TDO 1

==== CHANNEL f1 =====  
 NUC1 1H  
 P1 12.00 usec  
 PL1 -2.00 dB  
 SFO1 400.1324710 MHz

F2 - Processing parameters  
 SI 32768  
 SF 400.1300044 MHz  
 MW EM  
 SSB 0  
 LB 0.30 Hz  
 GB 0  
 PC 1.00

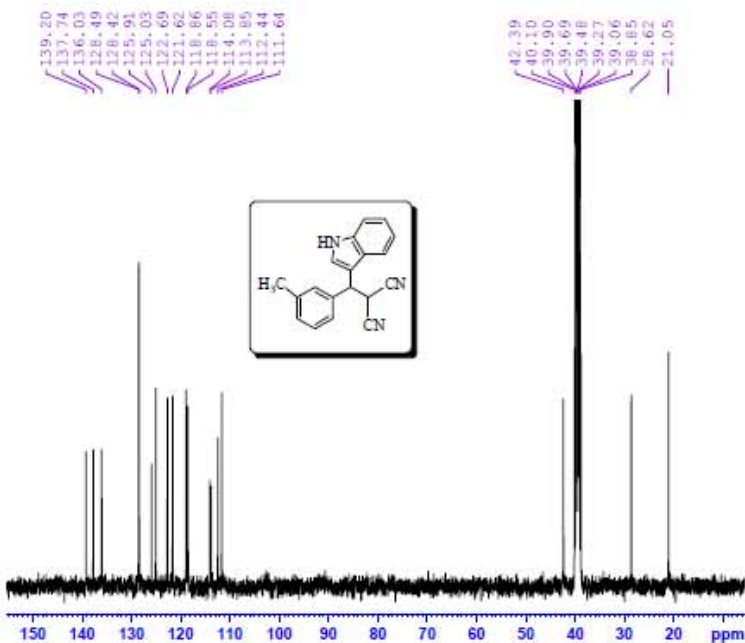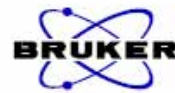

Current Data Parameters  
 NAME 31052010-test  
 EXPNO 1  
 PROCNO 1

F2 - Acquisition Parameters  
 Date\_ 20100531  
 Time 21.38  
 INSTRUM spect  
 PROBHD 5 mm PARBO HP-  
 PULPROG zgpg30  
 TD 65536  
 SOLVENT dsgd  
 NS 128  
 DS 0  
 SWH 24030.461 Hz  
 FIDRES 0.356798 Hz  
 AQ 1.3631988 sec  
 RG 2050  
 DW 20.800 usec  
 DE 6.50 usec  
 TE 300.0 K  
 D1 2.00000000 sec  
 d11 0.13000000 sec  
 DELTA 1.89999998 sec  
 TDO 1

==== CHANNEL f1 =====  
 NUC1 13C  
 P1 15.50 usec  
 PL1 -1.00 dB  
 SFO1 100.6286298 MHz

==== CHANNEL f2 =====  
 CPDPRG2 waltz16  
 NUC2 1H  
 PCPD12 60.00 usec  
 PL12 11.35 dB  
 PL13 13.05 dB  
 PL2 -2.00 dB  
 SFO2 400.1316003 MHz

F2 - Processing parameters  
 SI 32768  
 SF 100.6128192 MHz  
 MW EM  
 SSB 0  
 LB 1.00 Hz  
 GB 0  
 PC 1.40

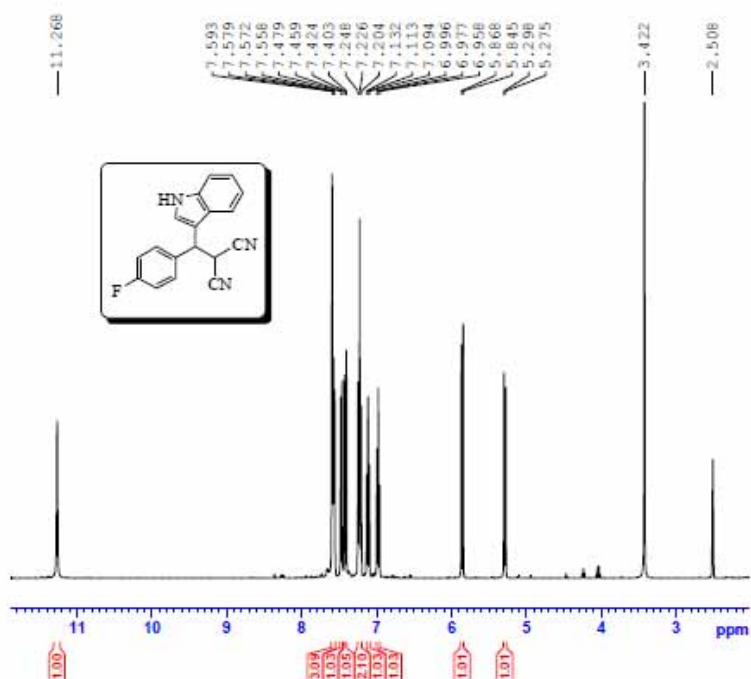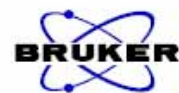

Current Data Parameters  
 NAME 28052010-teat  
 EXPNO 1  
 PROCNO 1

F2 - Acquisition Parameters  
 Date\_ 20100528  
 Time 22.11  
 INSTRUM spect  
 PROBRD 5 mm PABBO BB-  
 PULPROG zg30  
 TD 65536  
 SOLVENT DMSO  
 NS 16  
 DS 0  
 SWH 8223.685 Hz  
 FIDRES 0.125483 Hz  
 AQ 3.9846287 sec  
 RG 98.5  
 DW 60.800 usec  
 DE 6.50 usec  
 TE 300.0 K  
 D1 1.00000000 sec  
 TDO 1

----- CHANNEL f1 -----  
 NUCL1 1H  
 P1 12.00 usec  
 PL1 -2.00 dB  
 SFO1 400.1324710 MHz

F2 - Processing parameters  
 SI 32768  
 SF 400.1300024 MHz  
 WDW EM  
 SSB 0  
 LB 0.30 Hz  
 GB 0  
 PC 1.00

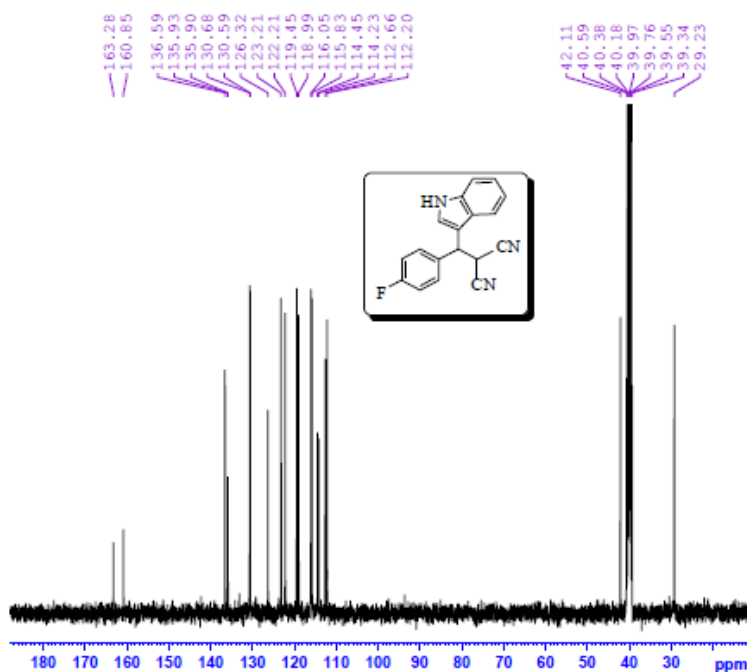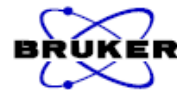

Current Data Parameters  
 NAME 28052010-teat  
 EXPNO 2  
 PROCNO 1

F2 - Acquisition Parameters  
 Date\_ 20100528  
 Time 22.20  
 INSTRUM spect  
 PROBRD 5 mm PABBO BB-  
 PULPROG zgpg30  
 TD 65536  
 SOLVENT DMSO  
 NS 128  
 DS 0  
 SWH 24038.461 Hz  
 FIDRES 0.366798 Hz  
 AQ 1.3631988 sec  
 RG 2080  
 DW 20.800 usec  
 DE 6.50 usec  
 TE 297.2 K  
 D1 2.00000000 sec  
 d11 0.03000000 sec  
 DELTA 1.89999998 sec  
 TDO 1

----- CHANNEL f1 -----  
 NUCL1 13C  
 P1 15.20 usec  
 PL1 -1.00 dB  
 SFO1 100.6228298 MHz

----- CHANNEL f2 -----  
 CPDPRG2 waltz16  
 NUCL2 1H  
 P2PRG 60.00 usec  
 PL12 11.35 dB  
 PL13 13.05 dB  
 PL2 -2.00 dB  
 SFO2 400.1316005 MHz

F2 - Processing parameters  
 SI 32768  
 SF 100.6128193 MHz  
 WDW EM  
 SSB 0  
 LB 1.00 Hz  
 GB 0  
 PC 1.40

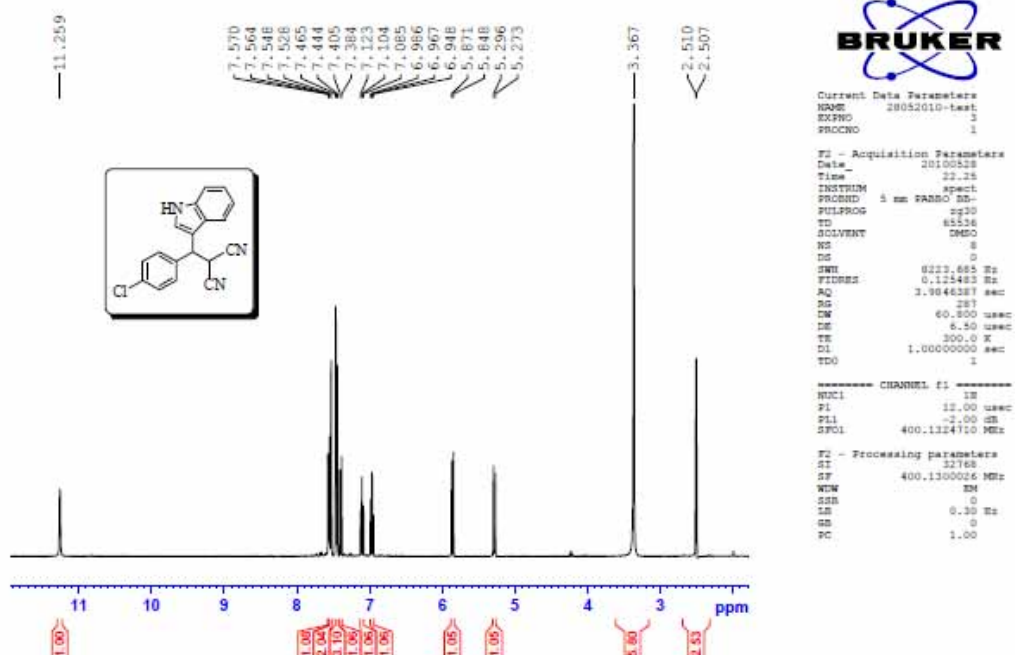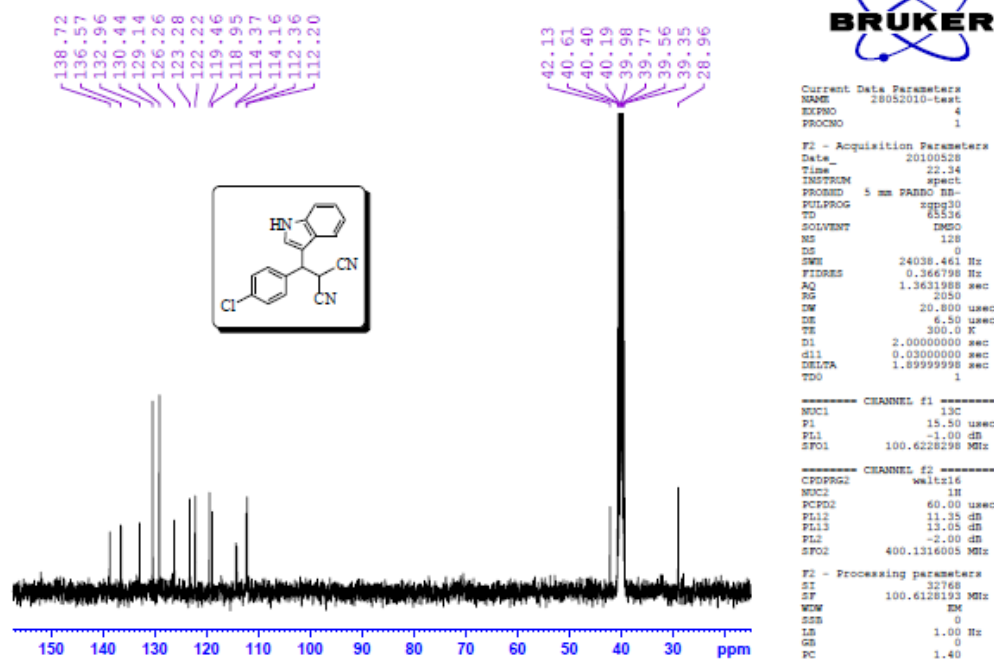

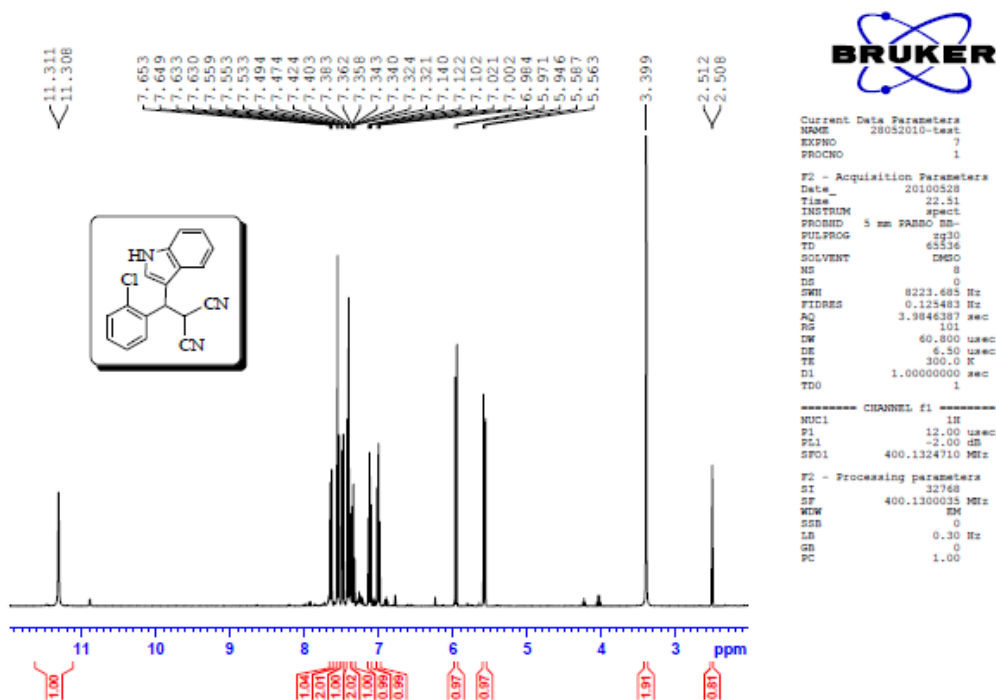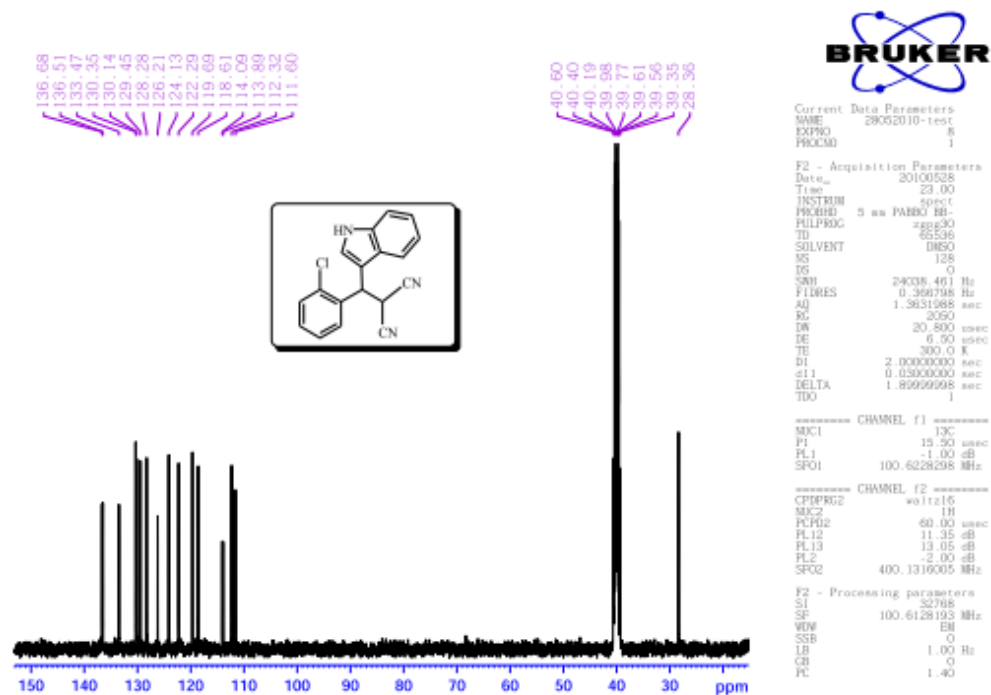

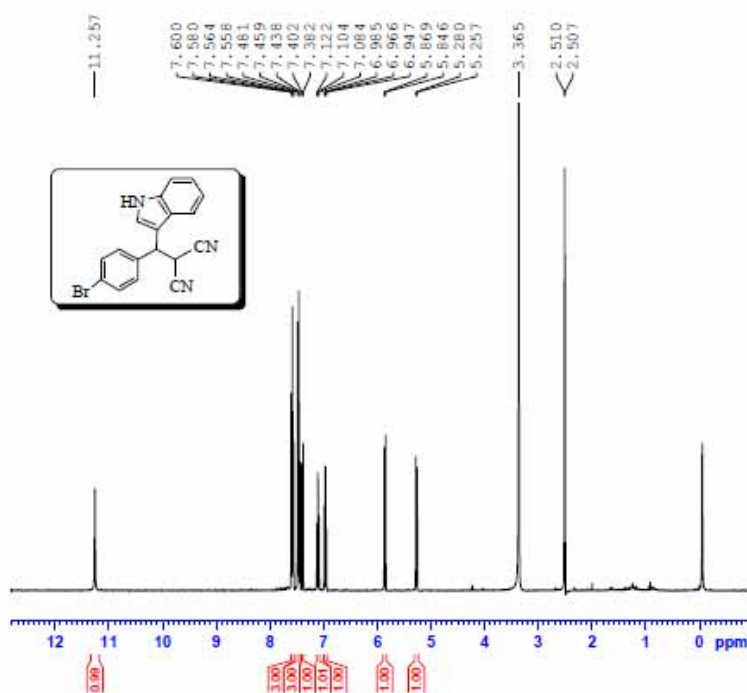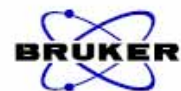

```

Current Data Parameters
NAME      28052010-test
EXPNO    1
PROCNO   1

F2 - Acquisition Parameters
Date_    20100528
Time     22.38
INSTRUM  spect
PROBHD   5 mm PABBO BB-
PULPROG  zg30
TD        65536
SOLVENT  DMSO
NS        8
DS        0
SWH       8222.865 Hz
FIDRES    0.125483 Hz
AQ         3.9046387 sec
RG         281
DM         60.800 usec
DE         6.50 usec
TE         300.2 K
D1         1.00000000 sec
TDO       1

===== CHANNEL f1 =====
NUC1      1H
P1        12.00 usec
PL1       -2.00 dB
SFO1     400.1214710 MHz

F2 - Processing parameters
SI        32768
SF        400.1299167 MHz
WDW       EM
SSB       0
LB        0.30 Hz
GB        0
PC        1.00
    
```

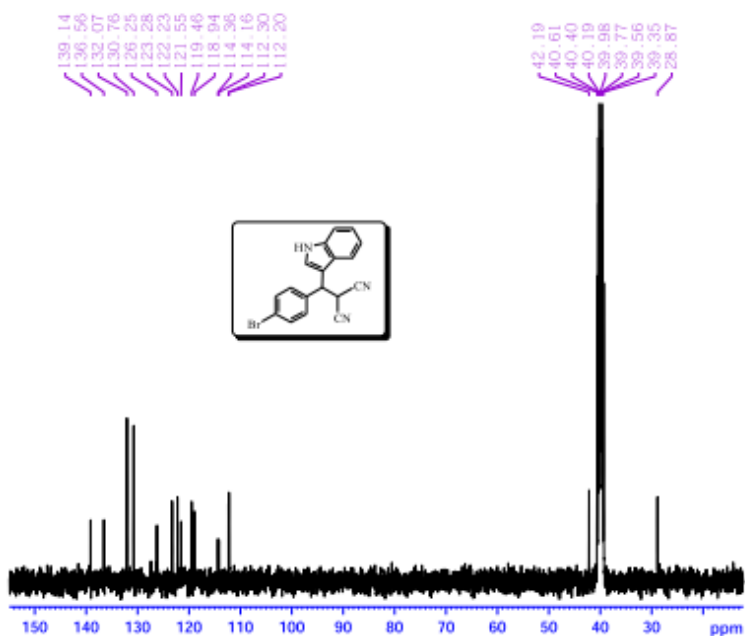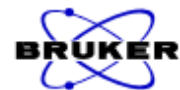

```

Current Data Parameters
NAME      28052010-test
EXPNO    6
PROCNO   1

F2 - Acquisition Parameters
Date_    20100528
Time     22.47
INSTRUM  spect
PROBHD   5 mm PABBO BB-
PULPROG  zgpg30
TD        65536
SOLVENT  DMSO
NS        128
DS        0
SWH       24038.461 Hz
FIDRES    0.366798 Hz
AQ         1.3831988 sec
RG         2000
DM         20.800 usec
DE         6.50 usec
TE         297.1 K
D1         2.00000000 sec
d11       0.03000000 sec
DELTA     1.89999998 sec
TDO       1

===== CHANNEL f1 =====
NUC1      13C
P1        15.50 usec
PL1       -1.00 dB
SFO1     100.6282698 MHz

===== CHANNEL f2 =====
CPDPRG2  waltz16
NUC2      1H
PCPD2    60.00 usec
PL12     11.35 dB
PL13     12.05 dB
PL2      -2.00 dB
SFO2     400.1316005 MHz

F2 - Processing parameters
SI        32768
SF        100.6128193 MHz
WDW       EM
SSB       0
LB        1.00 Hz
GB        0
PC        1.40
    
```

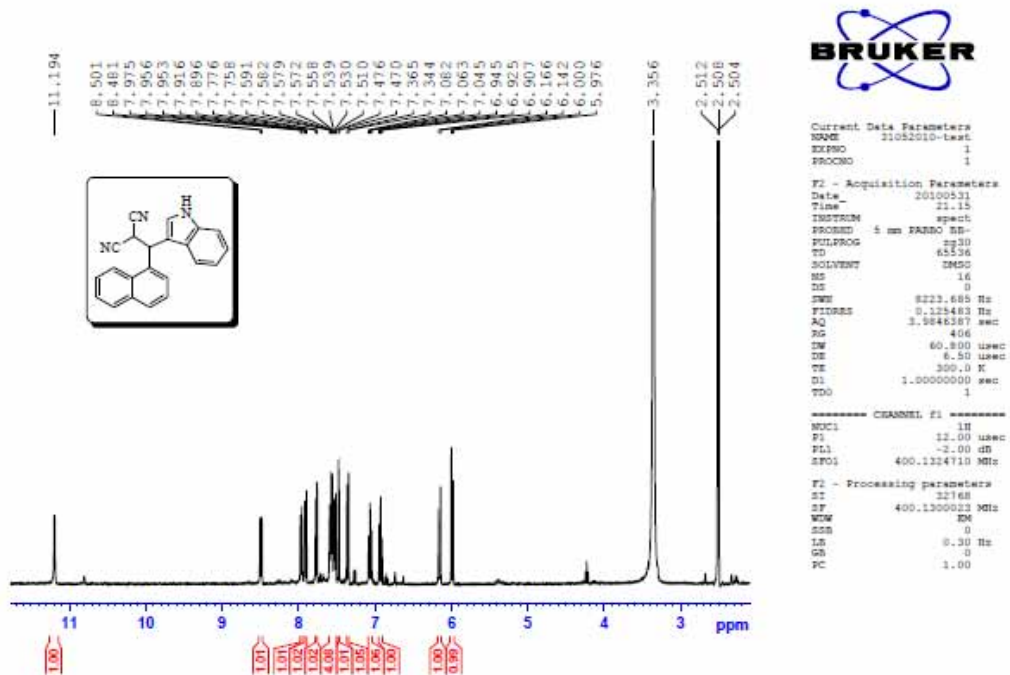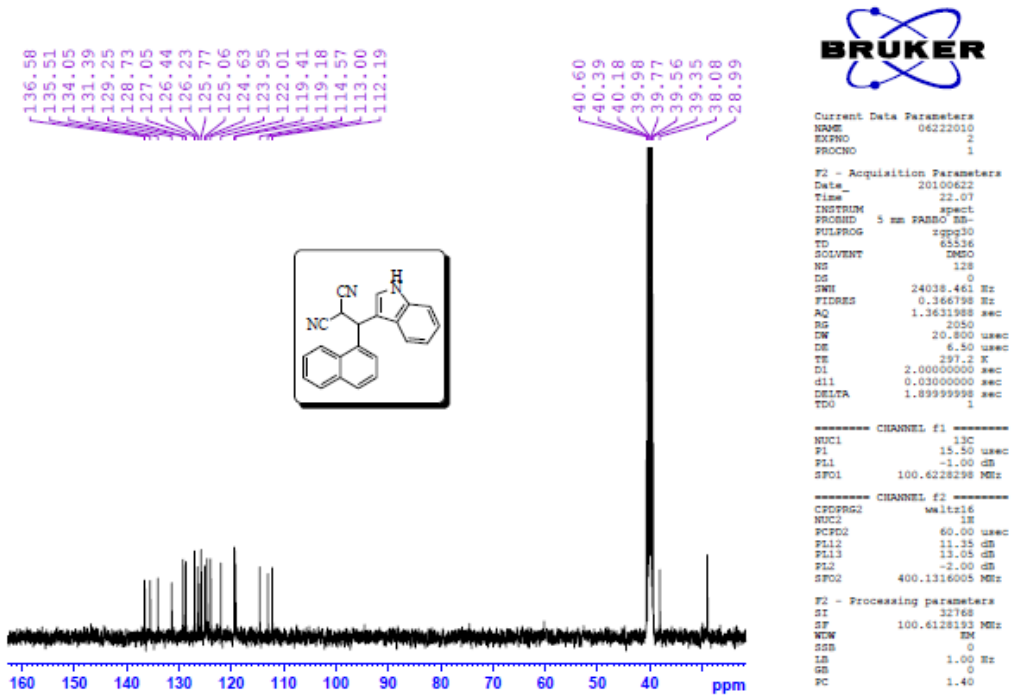



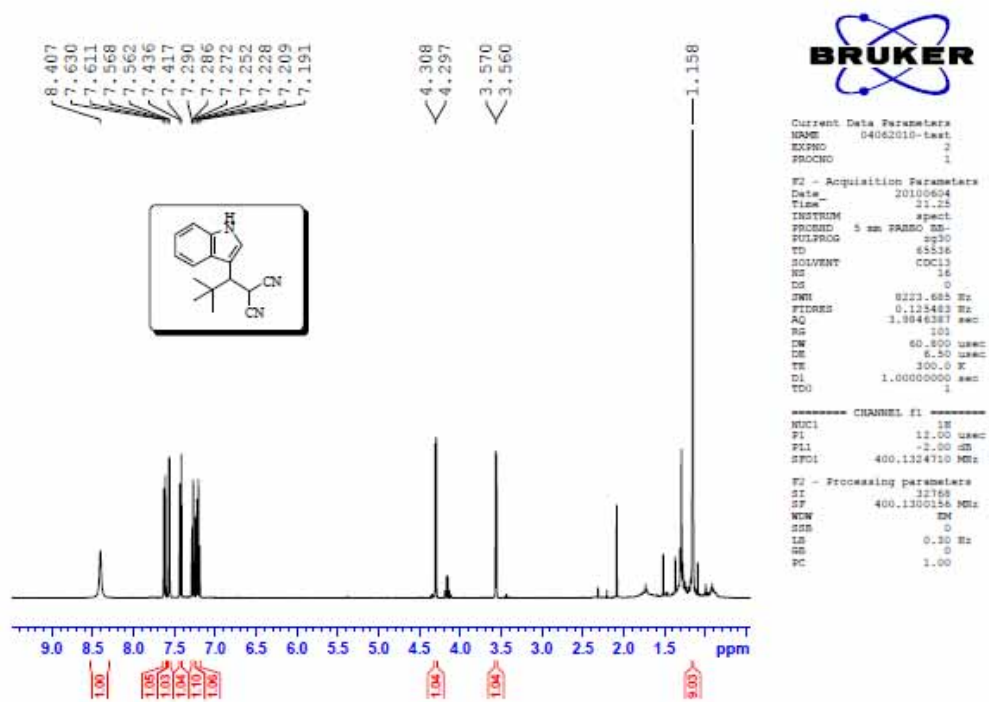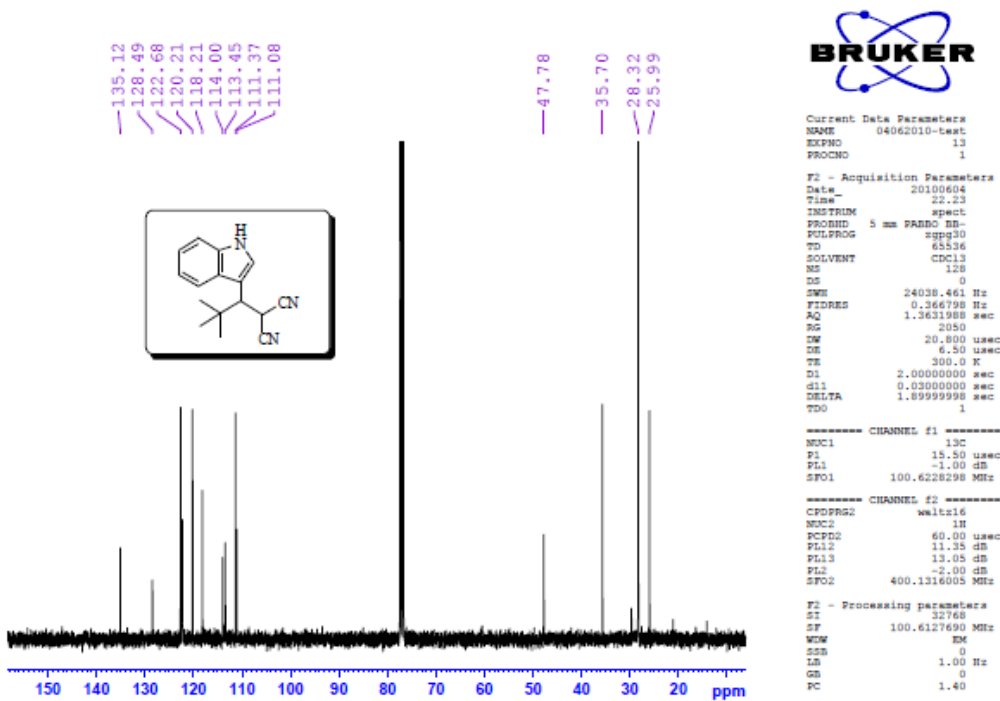

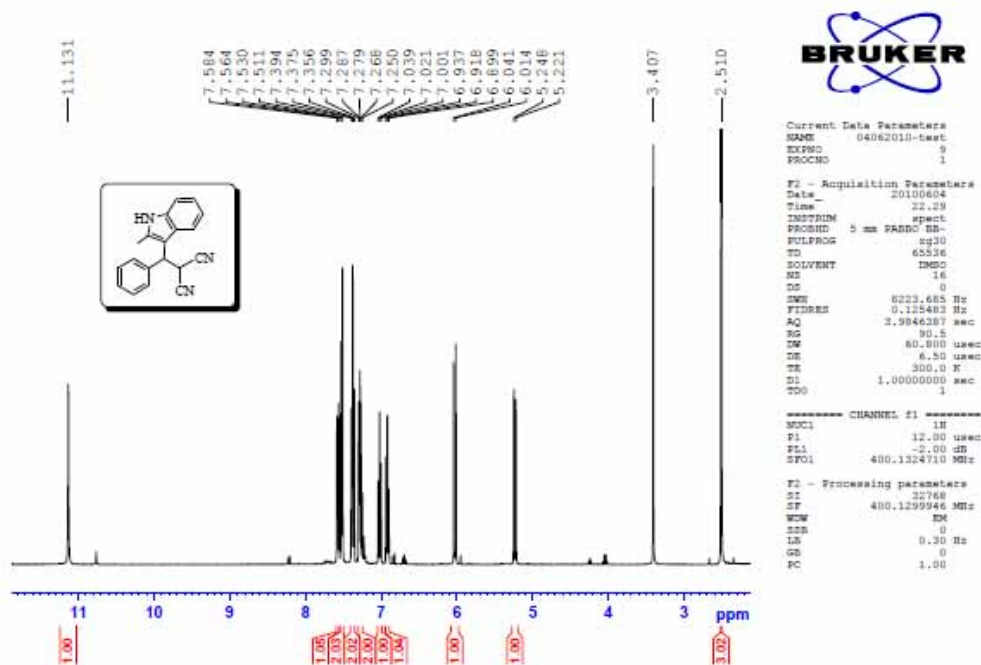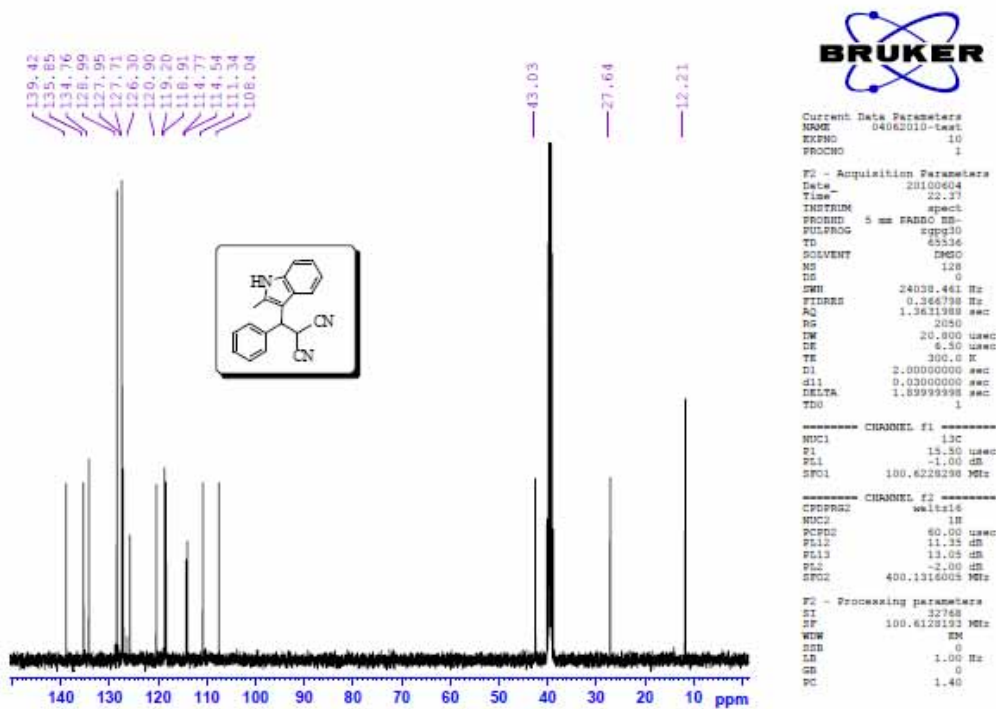

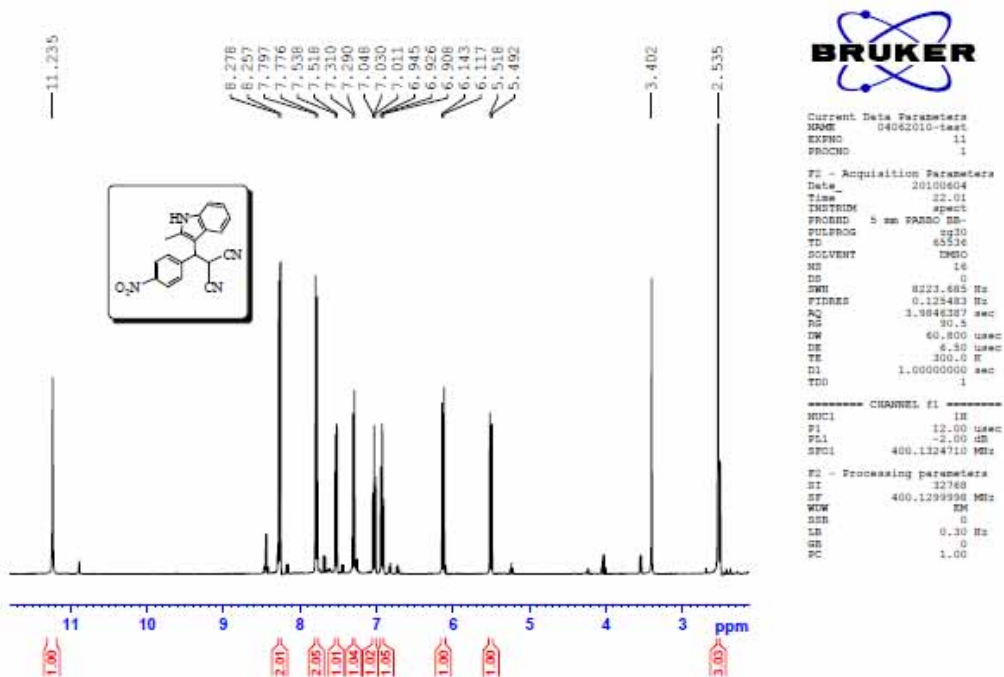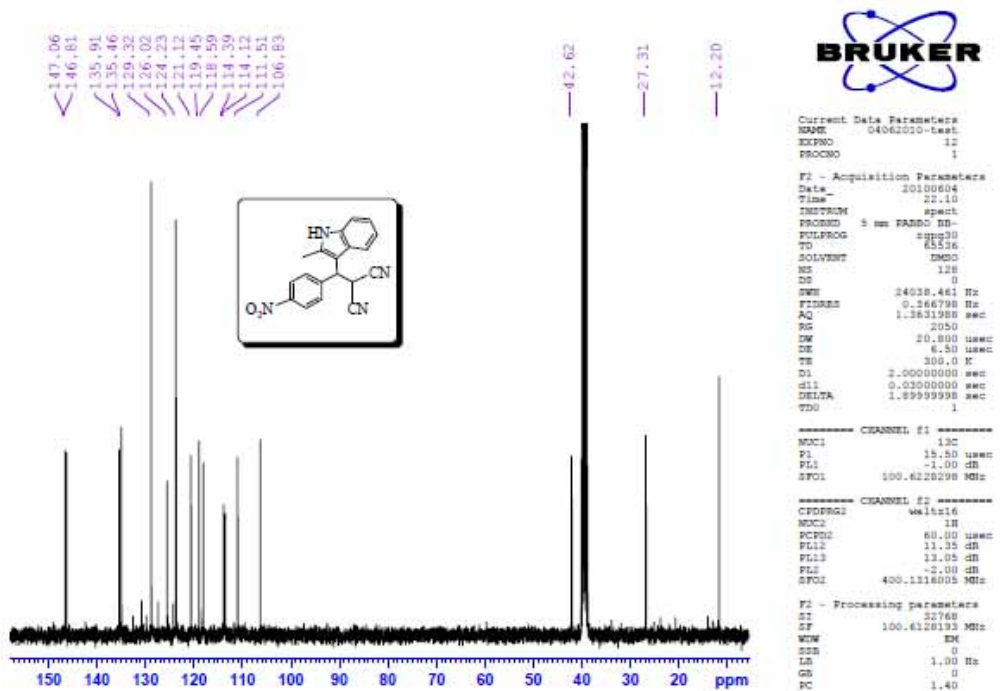

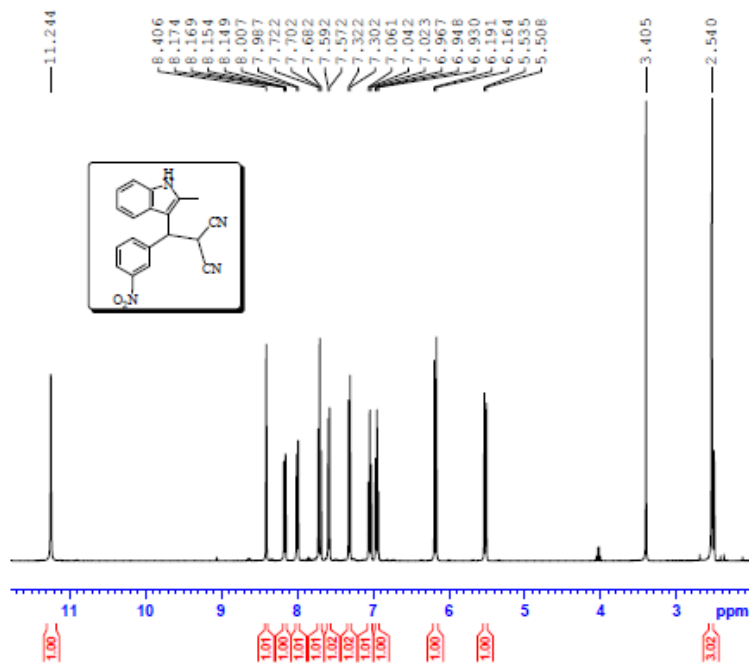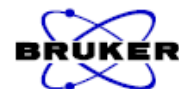

```

Current Data Parameters
NAME      06222010
EXPNO     3
PROCNO    1

F2 - Acquisition Parameters
Date_     20100622
Time      22.11
INSTRUM   spect
PROBHD    5 mm PABBO BB-
PULPROG   zg30
TD         65536
SOLVENT   DMSO
NS         8
DS         0
SWH        8223.685 Hz
FIDRES     0.125483 Hz
AQ         3.9846387 sec
RG         80.5
IN        60.800 usec
DE         6.50 usec
TE         300.0 K
D1         1.00000000 sec
TD0        1

===== CHANNEL f1 =====
NUC1       1H
P1         12.00 usec
PL1        -2.00 dB
SFO1       400.1324110 MHz

F2 - Processing parameters
SI         32768
SF         400.1399993 MHz
WDW        EM
SSB        0
LB         0.30 Hz
GB         0
PC         1.00
    
```

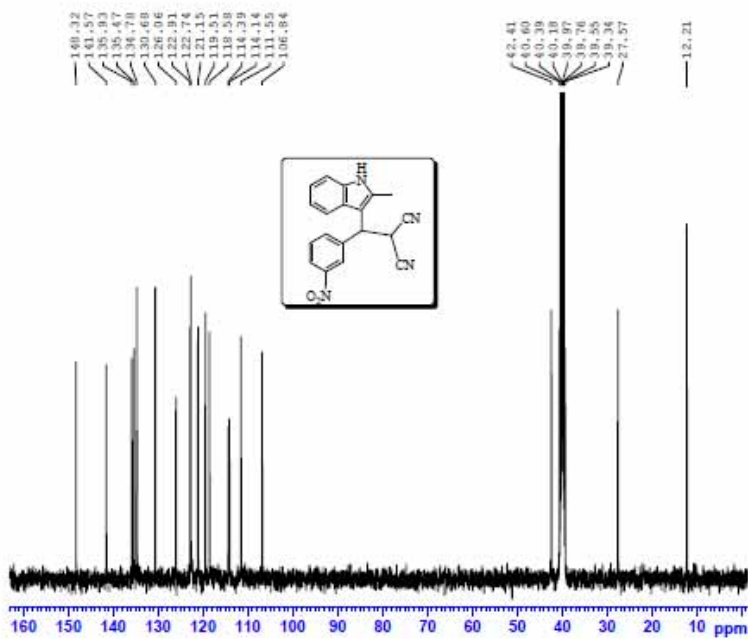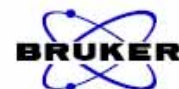

```

Current Data Parameters
NAME      06222010
EXPNO     4
PROCNO    1

F2 - Acquisition Parameters
Date_     20100622
Time      22.20
INSTRUM   spect
PROBHD    5 mm PABBO BB-
PULPROG   zgpg30
TD         65536
SOLVENT   DMSO
NS         128
DS         0
SWH        24038.461 Hz
FIDRES     0.366798 Hz
AQ         1.3631888 sec
RG         2030
IN        20.800 usec
DE         6.50 usec
TE         300.0 K
D1         2.00000000 sec
d11        0.03000000 sec
DELTA     1.89999998 sec
TD0        1

===== CHANNEL f1 =====
NUC1       13C
P1         15.20 usec
PL1        -1.00 dB
SFO1       100.6228298 MHz

===== CHANNEL f2 =====
CPDPRG2   waltz16
NUC2       1H
PCPD2     60.00 usec
PL12      11.35 dB
PL13      13.05 dB
PL2       -2.00 dB
SFO2       400.1316003 MHz

F2 - Processing parameters
SI         32768
SF         100.6128193 MHz
WDW        EM
SSB        0
LB         1.00 Hz
GB         0
PC         1.40
    
```

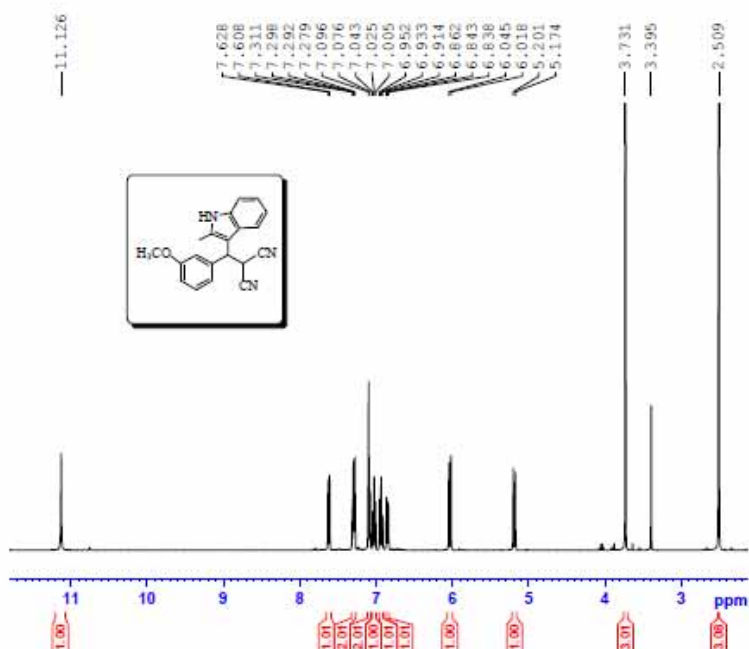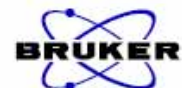

Current Data Parameters  
NAME 21062010-Test  
EXPNO 1  
PROCNO 1

F2 - Acquisition Parameters  
Date\_ 20100621  
Time 21.48  
INSTRUM spect  
PROBHD 5 mm PABBO BB-  
PULPROG zg30  
TD 65536  
SOLVENT DMSO  
NS 0  
DS 0  
SWH 8223.463 Hz  
FIDRES 0.123463 Hz  
AQ 3.9846387 sec  
RG 90.5  
DM 60.800 usec  
DE 6.40 usec  
TE 300.0 K  
D1 1.00000000 sec  
TD0 1

----- CHANNEL f1 -----  
NUC1 1H  
P1 12.00 usec  
PL1 -2.00 dB  
SFO1 400.1324710 MHz

F2 - Processing parameters  
SI 32768  
SF 400.1300071 MHz  
WDW EM  
SSB 0  
LB 0.30 Hz  
GB 0  
PC 1.00

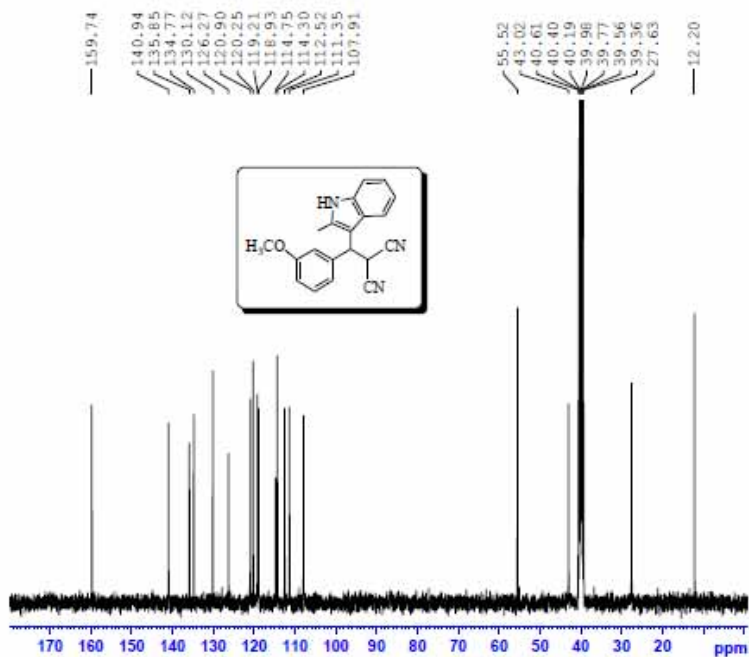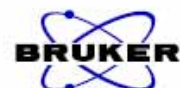

Current Data Parameters  
NAME 21062010-Test  
EXPNO 2  
PROCNO 1

F2 - Acquisition Parameters  
Date\_ 20100621  
Time 21.57  
INSTRUM spect  
PROBHD 5 mm PABBO BB-  
PULPROG zgpg30  
TD 65536  
SOLVENT DMSO  
NS 128  
DS 0  
SWH 24028.441 Hz  
FIDRES 0.366798 Hz  
AQ 1.3631988 sec  
RG 2050  
DM 20.800 usec  
DE 6.50 usec  
TE 300.0 K  
D1 2.00000000 sec  
d11 0.03000000 sec  
DELTA 1.89999998 sec  
TD0 1

----- CHANNEL f1 -----  
NUC1 13C  
P1 15.50 usec  
PL1 -1.00 dB  
SFO1 100.6226298 MHz

----- CHANNEL f2 -----  
CPDPRG2 waltz16  
NUC2 1H  
PCPD2 60.00 usec  
PL12 11.35 dB  
PL13 13.05 dB  
PL2 -2.00 dB  
SFO2 400.1316005 MHz

F2 - Processing parameters  
SI 32768  
SF 100.6126193 MHz  
WDW EM  
SSB 0  
LB 1.00 Hz  
GB 0  
PC 1.40

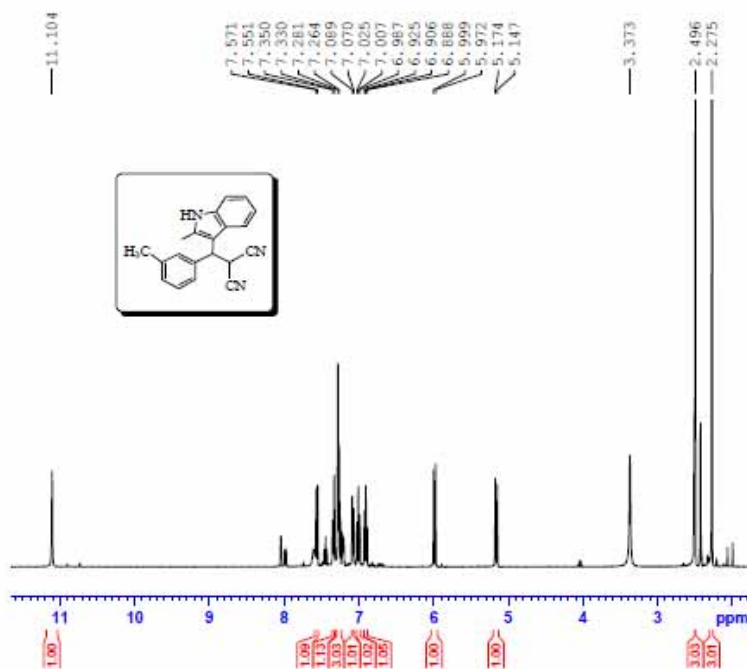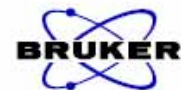

Current Data Parameters  
NAME 21062010-test  
EXPRO 3  
PROCNO 1

F2 - Acquisition Parameters  
Date\_ 20100621  
Time 22.02  
INSTRUM spect  
PROBHD 5 mm PABBO BB-  
PULPROG zg30  
TD 65536  
SOLVENT DMSO  
NS 8  
DS 0  
SWH 8223.685 Hz  
FIDRES 0.125483 Hz  
AQ 3.9846387 sec  
RG 114  
DM 60.000 usec  
DE 6.50 usec  
TE 300.2 K  
D1 1.00000000 sec  
TD0 1

----- CHANNEL f1 -----  
NUC1 1H  
P1 12.00 usec  
PL1 -2.00 dB  
SFO1 400.1324110 MHz

F2 - Processing parameters  
SI 32768  
SF 400.1300042 MHz  
WDW EM  
SSB 0  
LB 0.30 Hz  
GB 0  
PC 1.00

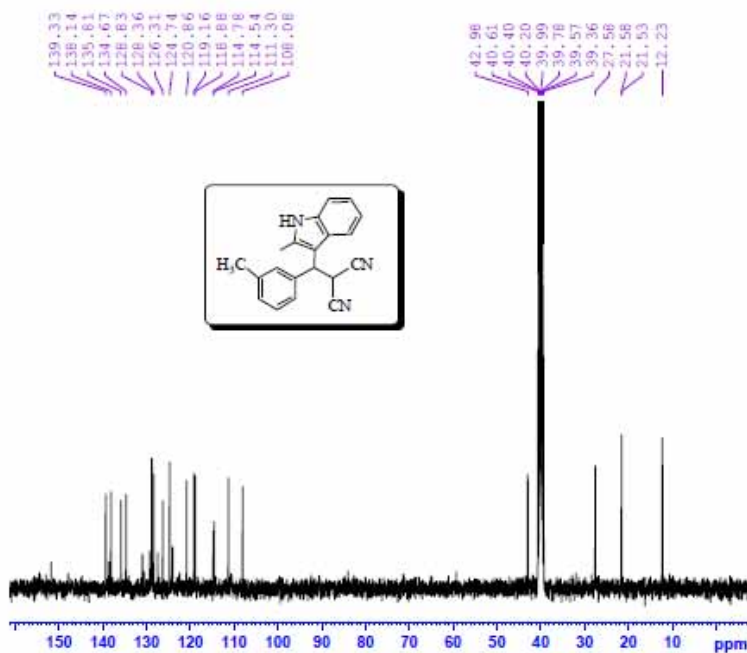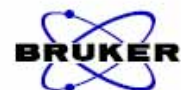

Current Data Parameters  
NAME 21062010-test  
EXPRO 4  
PROCNO 1

F1 - Acquisition Parameters  
Date\_ 20100621  
Time 22.10  
INSTRUM spect  
PROBHD 5 mm PABBO BB-  
PULPROG zgpg30  
TD 65536  
SOLVENT DMSO  
NS 128  
DS 0  
SWH 24038.461 Hz  
FIDRES 0.366798 Hz  
AQ 1.3611988 sec  
RG 2050  
DM 20.000 usec  
DE 6.50 usec  
TE 300.2 K  
D1 2.00000000 sec  
d11 0.03000000 sec  
DELTA 1.89999998 sec  
TD0 1

----- CHANNEL f1 -----  
NUC1 13C  
P1 15.50 usec  
PL1 -1.00 dB  
SFO1 100.6228298 MHz

----- CHANNEL f2 -----  
CPDPRG2 waltz16  
NUC2 1H  
PCPD2 60.00 usec  
PL12 11.35 dB  
PL13 13.05 dB  
PL2 -2.00 dB  
SFO2 400.1316005 MHz

F2 - Processing parameters  
SI 32768  
SF 100.6128193 MHz  
WDW EM  
SSB 0  
LB 1.00 Hz  
GB 0  
PC 1.40

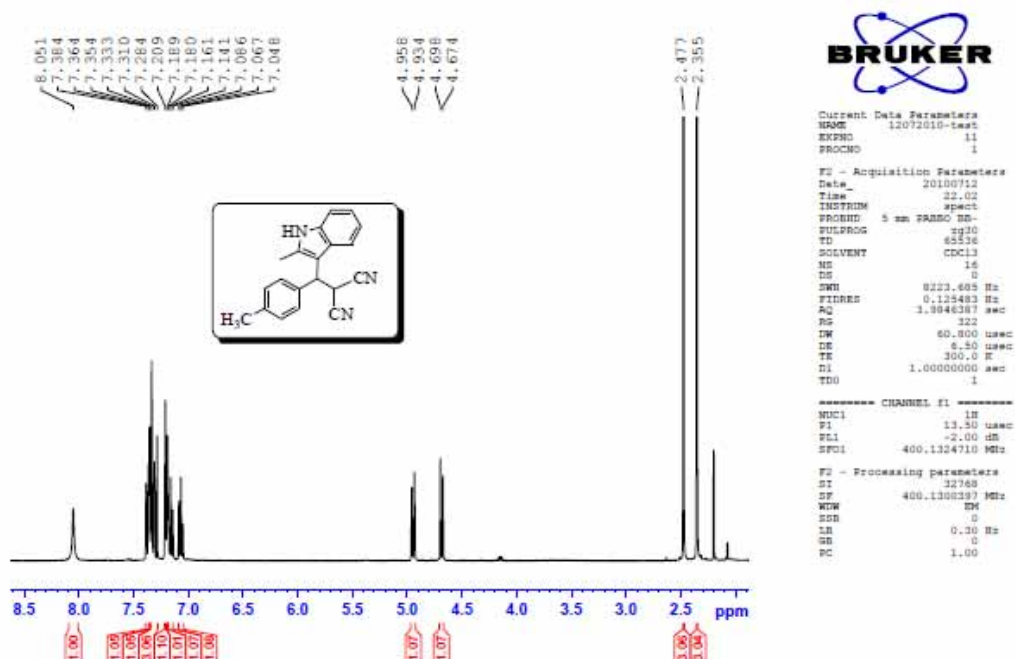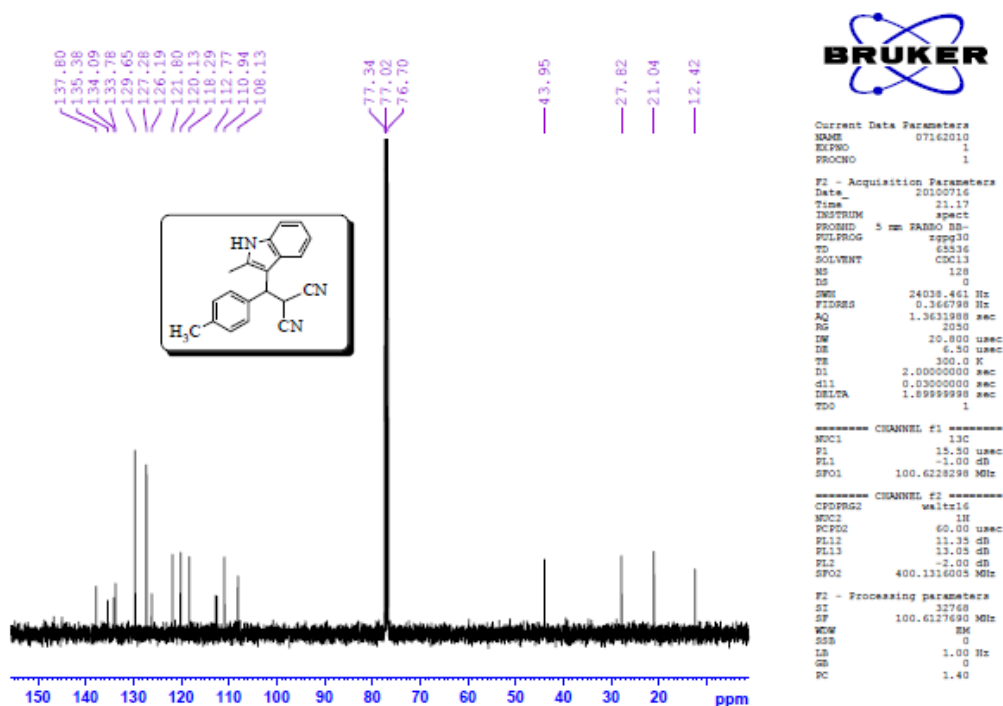

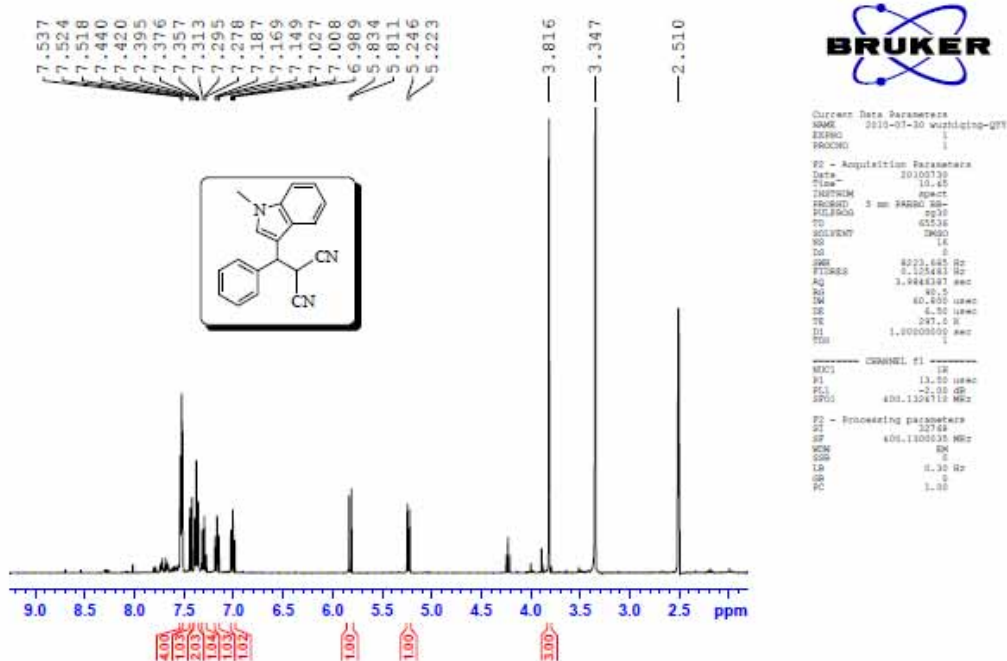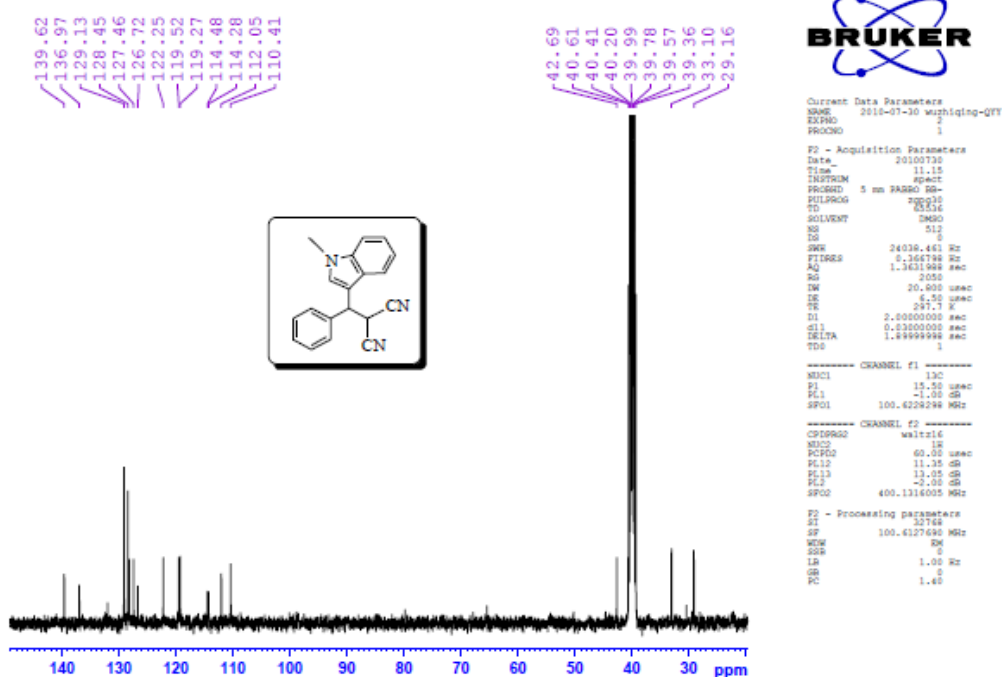



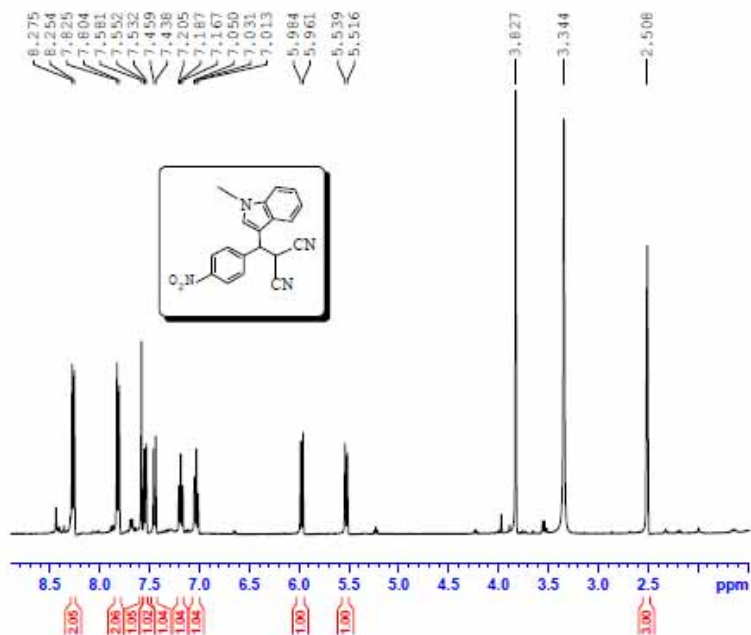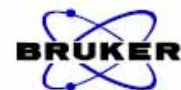

Current Data Parameters  
 NAME 07082010  
 EXPNO 10  
 PROCNO 1

F1 - Acquisition Parameters  
 Date\_ 20100708  
 Time 20.31  
 INSTRUM spect  
 PROBRD 5 mm F400 BB-  
 PULPROG zgpg30  
 TD 65536  
 SOLVENT DMSO  
 NS 8  
 DS 0  
 SWH 8223.685 Hz  
 FIDRES 0.125483 Hz  
 AQ 3.9246387 sec  
 RG 256  
 DW 60.800 usec  
 DE 6.50 usec  
 TE 300.2 K  
 D1 1.00000000 sec  
 TDO 1

===== CHANNEL f1 =====  
 NUC1 1H  
 P1 12.50 usec  
 PL1 -2.00 dB  
 SFO1 400.1324710 MHz

F2 - Processing parameters  
 SI 32768  
 SF 400.1300017 MHz  
 WDW EM  
 SS 0  
 LB 0.30 Hz  
 GB 0  
 PC 1.00

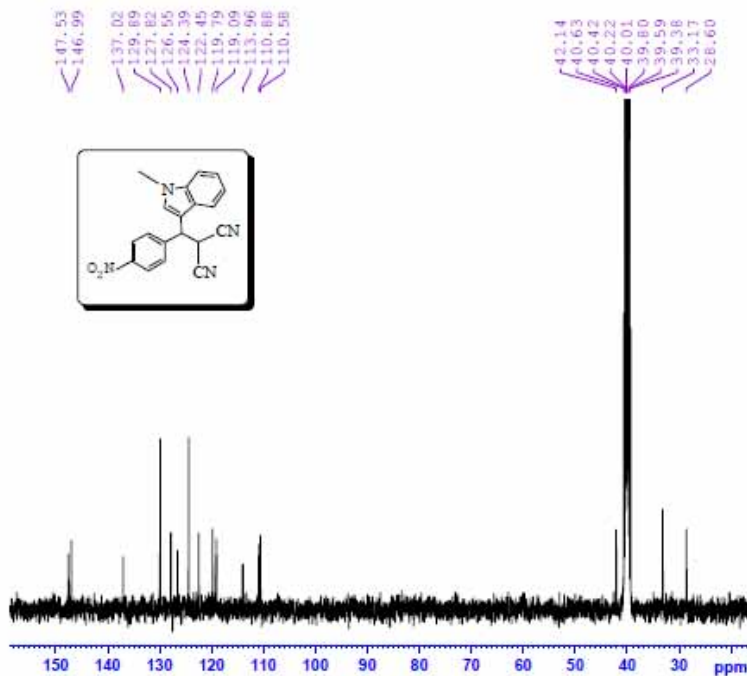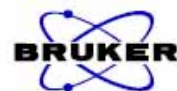

Current Data Parameters  
 NAME 07082010  
 EXPNO 11  
 PROCNO 1

F1 - Acquisition Parameters  
 Date\_ 20100708  
 Time 20.40  
 INSTRUM spect  
 PROBRD 5 mm F400 BB-  
 PULPROG zgpg30  
 TD 65536  
 SOLVENT DMSO  
 NS 128  
 DS 0  
 SWH 24028.481 Hz  
 FIDRES 0.268798 Hz  
 AQ 1.2631888 sec  
 RG 2050  
 DW 20.800 usec  
 DE 6.50 usec  
 TE 300.2 K  
 D1 1.00000000 sec  
 D11 0.03000000 sec  
 DELTA 1.88999998 sec  
 TDO 1

===== CHANNEL f1 =====  
 NUC1 13C  
 P1 15.50 usec  
 PL1 -1.00 dB  
 SFO1 100.6228238 MHz

===== CHANNEL f2 =====  
 CPDPRG2 waltz16  
 NUC2 1H  
 PCPD2 60.00 usec  
 PL12 11.25 dB  
 PL13 13.05 dB  
 PL2 -2.00 dB  
 SFO2 400.1316005 MHz

F2 - Processing parameters  
 SI 32768  
 SF 100.6128193 MHz  
 WDW EM  
 SS 0  
 LB 1.00 Hz  
 GB 0  
 PC 1.40

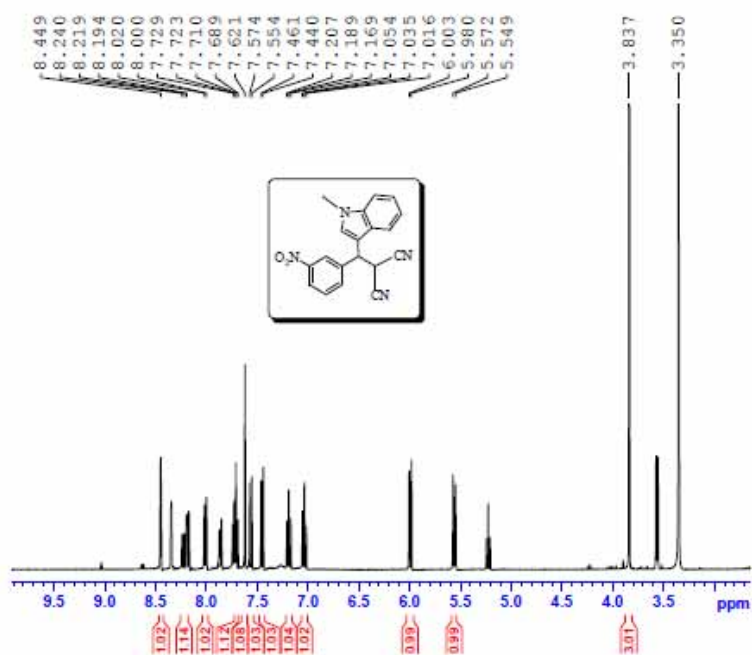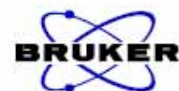

```
Current Data Parameters
NAME      07082010
EXPNO     8
PROCNO    1

F2 - Acquisition Parameters
Date_     20100708
Time      20.18
INSTRUM   spect
PROBHD    5 mm PABBO BB-
PULPROG   zg30
TD         65536
SOLVENT   DMSO
NS         8
DS         0
SWH        8223.683 Hz
FIDRES     0.125483 Hz
AQ         3.9846387 sec
RG         144
TW         60.808 usec
DE         8.50 usec
TE         300.0 K
D1         1.00000000 sec
TD0        1

----- CHANNEL f1 -----
NUC1       1H
P1         13.50 usec
PL1        -2.00 dB
SFO1       400.1324710 MHz

F2 - Processing parameters
SI         32768
SF         400.1289824 MHz
WDW        EM
SSB        0
LB         0.30 Hz
GB         0
PC         1.00
```

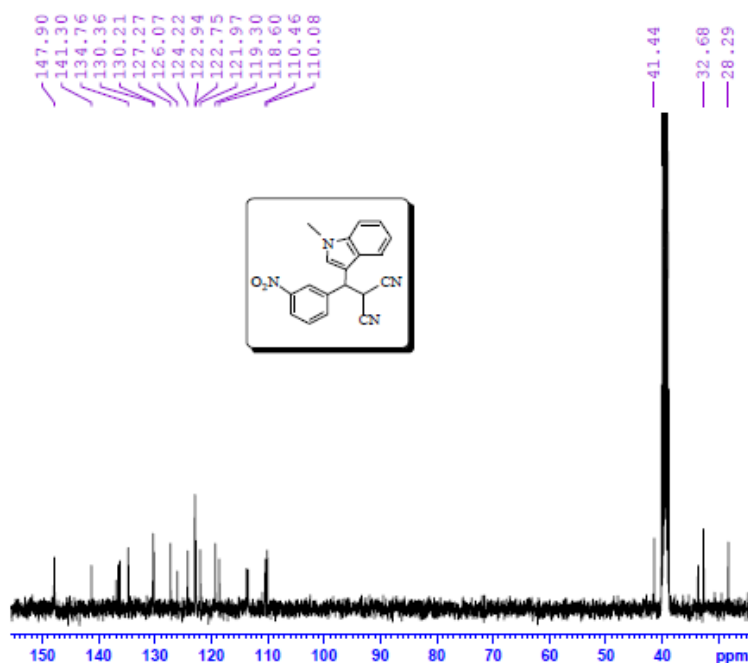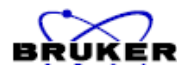

```
Current Data Parameters
NAME      07082010
EXPNO     9
PROCNO    1

F2 - Acquisition Parameters
Date_     20100708
Time      20.26
INSTRUM   spect
PROBHD    5 mm PABBO BB-
PULPROG   zgpg30
TD         65536
SOLVENT   DMSO
NS         128
DS         0
SWH        24038.461 Hz
FIDRES     0.366798 Hz
AQ         1.3651988 sec
RG         2050
TW         20.800 usec
DE         6.50 usec
TE         300.0 K
D1         2.00000000 sec
d11        0.03000000 sec
DELTA     1.89999998 sec
TD0        1

----- CHANNEL f1 -----
NUC1       13C
P1         15.50 usec
PL1        -1.00 dB
SFO1       100.6228298 MHz

----- CHANNEL f2 -----
CPDPRG2   waltz16
NUC2       1H
PCPD2     60.00 usec
PL12       11.35 dB
PL13       13.05 dB
PL2        -2.00 dB
SFO2       400.1316005 MHz

F2 - Processing parameters
SI         32768
SF         100.6128193 MHz
WDW        EM
SSB        0
LB         1.00 Hz
GB         0
PC         1.40
```
